# Supplementary material
Source: MDPI journal article supplement (https://www.mdpi.com/2414-4088/8/5/41)
Supplement: s1 [file s1]

Archive with 1 entries (1 files):
- mti-2988626-supplementary.pdf
