# Supplementary material
Source: MDPI journal article supplement (https://www.mdpi.com/2414-4088/8/5/41)
Supplement: s1 [file s1 › mti-2988626-supplementary.pdf]

# User-Centered Evaluation Framework for AR Applications

Andrea Picardi ([andrea.picardi@polimi.it](mailto:andrea.picardi@polimi.it)), Giandomenico Caruso ([giandomenico.caruso@polimi.it](mailto:giandomenico.caruso@polimi.it))

Department of Mechanical Engineering, Politecnico di Milano, 20156 Milano, Italy

# How to read the framework

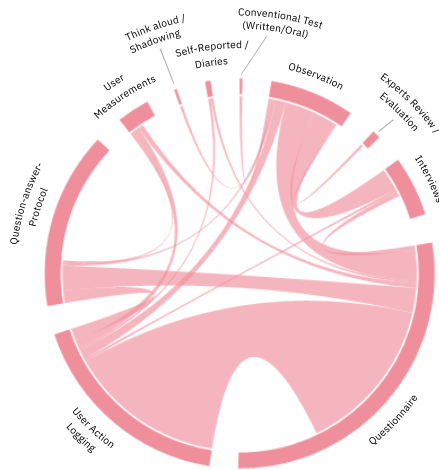

## Methodologies used correlation chart

Correlation chart between methodologies used, the width of the flows corresponds to the number of times the methodology has been used. The external arches correspond to the total use within the domain/field.

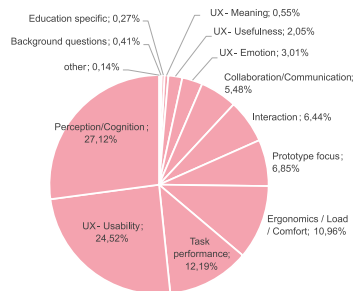

## Investigated HCI aspects pie

Repartition of the HCI aspects investigated within the domain/field.

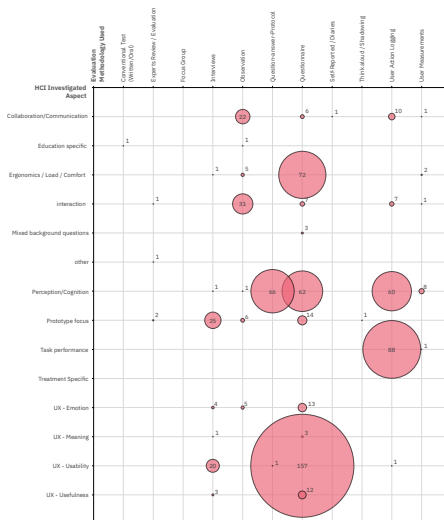

## Method Used & Aspects matrix

Bubble graph that puts in correlation the method used for each HCI aspect within the domain.

Here we can easily see if one pair is more used than the other through the size of each bubble.

## Section A – Reference tables: Domain and Fields

|                                         |           |                                                          |           |
|-----------------------------------------|-----------|----------------------------------------------------------|-----------|
| <b>Business &amp; Services</b>          | <b>4</b>  | <b>Generic Interface</b>                                 | <b>40</b> |
| Advertising / Product preview           |           | Calibration                                              |           |
| Fashion / Makeup                        |           | On site collaboration                                    |           |
| Retail                                  |           | Info presentation / visualization                        |           |
| <b>Communication &amp; Telepresence</b> | <b>10</b> | Interactions & Ergonomics                                |           |
| Remote Help                             |           | Perception                                               |           |
| Telepresence & Remote collaboration     |           | Tangible Interface                                       |           |
| Telepresence Surgery                    |           | <b>Health Care &amp; Medicine</b>                        | <b>50</b> |
| <b>Cultural &amp; Tourism</b>           | <b>14</b> | Elderly / Disables Help                                  |           |
| Commercial exploration & discovery      |           | Emergency                                                |           |
| Heritage exploration & discovery        |           | Personal Help                                            |           |
| Museum & Exhibitions                    |           | Phobia Treatment                                         |           |
| <b>Education &amp; Training</b>         | <b>20</b> | Rehabilitation                                           |           |
| Design, Engineering and Architecture    |           | Surgery                                                  |           |
| History                                 |           | Training                                                 |           |
| Languages                               |           | <b>Industry</b>                                          | <b>58</b> |
| Music                                   |           | Assembly                                                 |           |
| Orientation                             |           | Design & Engineering                                     |           |
| Other                                   |           | Logistics                                                |           |
| PA                                      |           | Maintenance                                              |           |
| Science subjects                        |           | Manufacturing                                            |           |
| Serious game                            |           | Training                                                 |           |
| Special needs education                 |           | <b>Navigation &amp; Driving</b>                          | <b>64</b> |
| <b>Entertainment</b>                    | <b>30</b> | Driving                                                  |           |
| Gaming                                  |           | Info / Annotations AR & Remote viewing                   |           |
| Narrative experience                    |           | Inside orientation & space navigation                    |           |
| <b>Field Operations</b>                 | <b>36</b> | Outside orientation & space navigation                   |           |
| Archaeological                          |           | Remote orientation & navigation (i.e., on map)           |           |
| CSI                                     |           | <b>Other</b>                                             | <b>72</b> |
| Military Operations                     |           | Generic Perception on AR<br>( Expectations / acceptance) |           |
| On site planning / maintenance          |           | Generic Perception on AR - Immersion / motivation        |           |
|                                         |           | Generic Perception on AR - Privacy                       |           |
|                                         |           | Generic Perception on AR - State of the art              |           |
|                                         |           | human/robot/AI interaction                               |           |
|                                         |           | Security                                                 |           |

## Section B - Correlation charts

### Business & Services

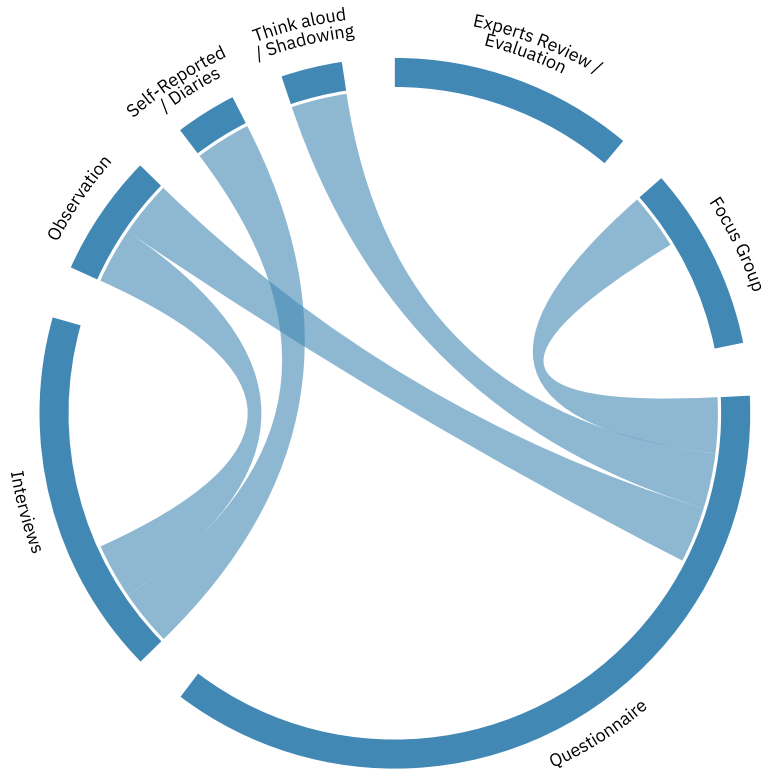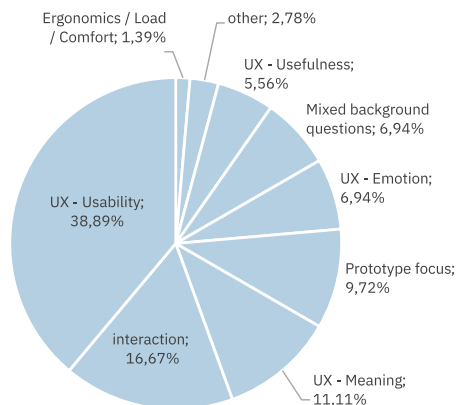

# Section C - Method Used & Aspects Matrix

## Business & Services

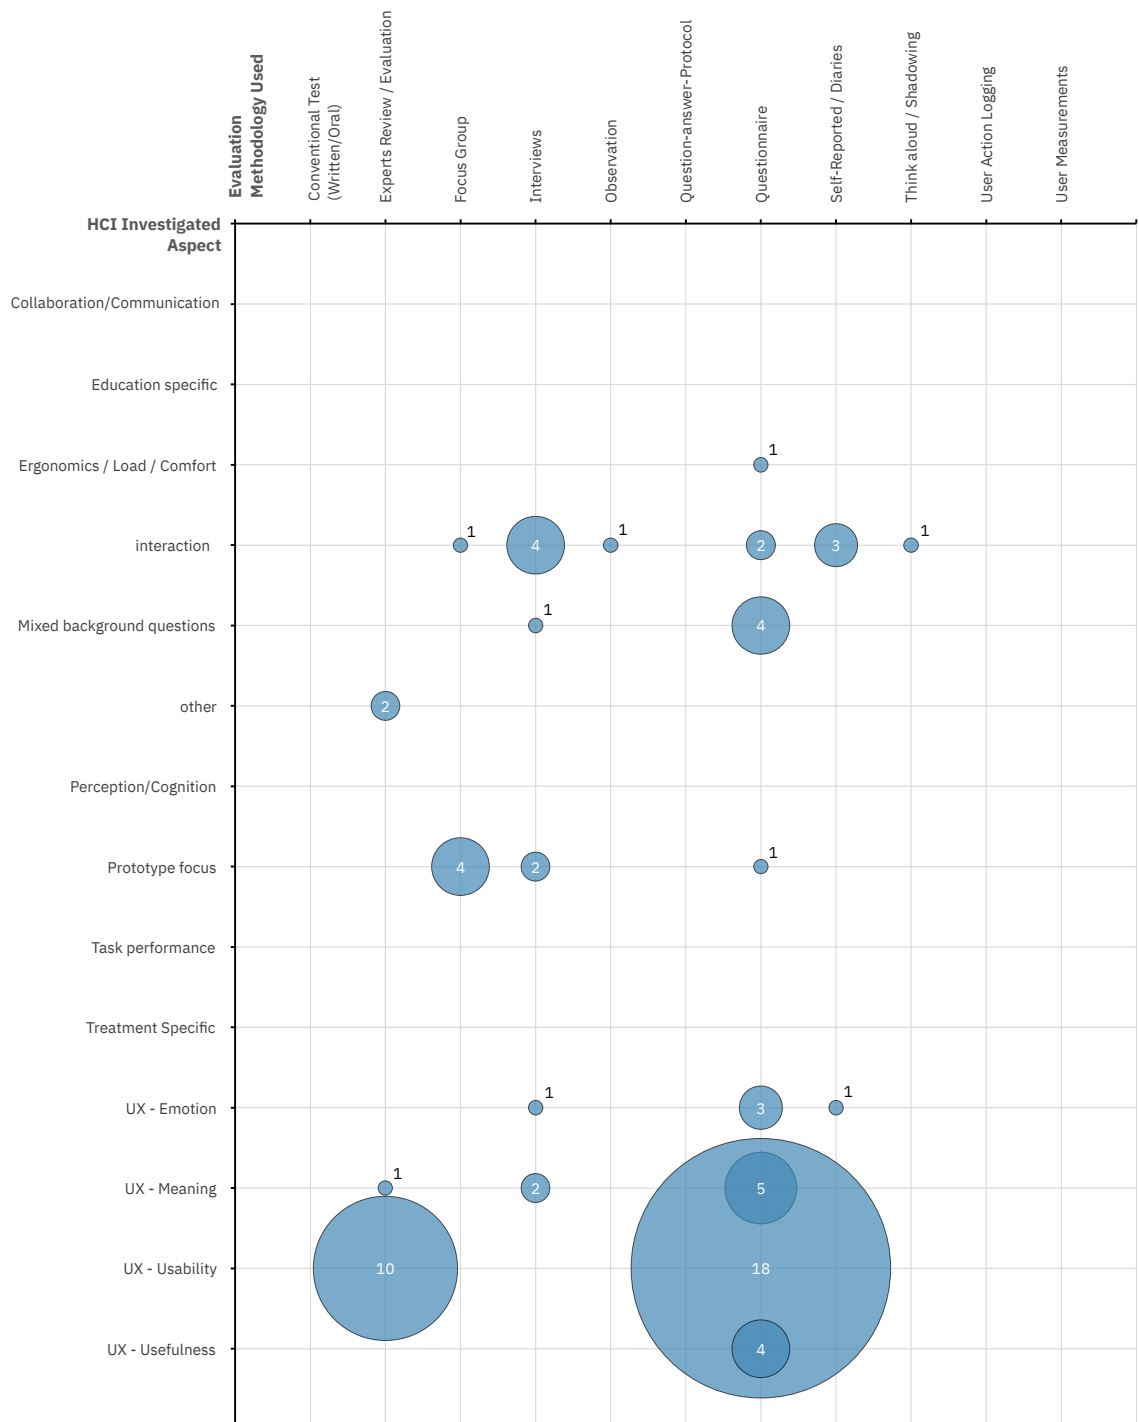

## Section D – Lookup Table: Business & Services

|                                                                                         |           |               |
|-----------------------------------------------------------------------------------------|-----------|---------------|
| <b>Ergonomics / Load / Comfort</b>                                                      | <b>1</b>  | <b>1,39%</b>  |
| <b>Questionnaire</b>                                                                    |           |               |
| adapted from previous/similar research                                                  |           |               |
| A Mixed Reality Virtual Clothes Try-On System by Yuan et al. (10.1109/TMM.2013.2280560) | 1         | 1,39%         |
| <b>interaction</b>                                                                      | <b>12</b> | <b>16,67%</b> |
| <b>Interviews</b>                                                                       |           |               |
| semi-structured                                                                         | 3         | 4,17%         |
| structured                                                                              | 1         | 1,39%         |
| <b>Self-Reported / Diaries</b>                                                          |           |               |
| Self-reported data / Diaries                                                            | 3         | 4,17%         |
| <b>Questionnaire</b>                                                                    |           |               |
| Technology Acceptance Model (TAM)                                                       |           |               |
| Unspecified                                                                             | 1         | 1,39%         |
| 7 Likert scale                                                                          | 1         | 1,39%         |
| <b>Observation</b>                                                                      |           |               |
| evaluators observations                                                                 |           |               |
| on material recorded                                                                    | 1         | 1,39%         |
| <b>Focus Group</b>                                                                      |           |               |
| Paper wireframe creation with users                                                     | 1         | 1,39%         |
| <b>Think aloud / Shadowing</b>                                                          |           |               |
| Shadowing                                                                               | 1         | 1,39%         |
| <b>Mixed background questions</b>                                                       | <b>5</b>  | <b>6,94%</b>  |
| <b>Questionnaire</b>                                                                    |           |               |
| custom-made                                                                             |           |               |
| 1 to 5 scale                                                                            | 2         | 2,78%         |
| closed ended question/s                                                                 | 1         | 1,39%         |
| remote survey                                                                           |           |               |
| online survey                                                                           | 1         | 1,39%         |
| <b>Interviews</b>                                                                       |           |               |
| structured                                                                              | 1         | 1,39%         |
| <b>other</b>                                                                            | <b>2</b>  | <b>2,78%</b>  |
| <b>Experts Review / Evaluation</b>                                                      |           |               |
| Digital Ethnography                                                                     | 2         | 2,78%         |

|                                                                                         |          |               |
|-----------------------------------------------------------------------------------------|----------|---------------|
| <b>Prototype focus</b>                                                                  | <b>7</b> | <b>9,72%</b>  |
| <b>Focus Group</b>                                                                      |          |               |
| Post-test focus group                                                                   | 3        | 4,17%         |
| Paper wireframe creation with users                                                     | 1        | 1,39%         |
| <b>Interviews</b>                                                                       |          |               |
| structured                                                                              |          |               |
| 7 Likert scale                                                                          | 1        | 1,39%         |
| semi-structured                                                                         | 1        | 1,39%         |
| <b>Questionnaire</b>                                                                    |          |               |
| remote survey                                                                           |          |               |
| online survey                                                                           | 1        | 1,39%         |
| <b>UX - Emotion</b>                                                                     | <b>5</b> | <b>6,94%</b>  |
| <b>Questionnaire</b>                                                                    |          | <b>4,17%</b>  |
| Technology Acceptance Model (TAM)                                                       |          |               |
| Unspecified                                                                             | 1        | 1,39%         |
| 7 Likert scale                                                                          | 1        | 1,39%         |
| adapted from previous/similar research                                                  |          |               |
| A Mixed Reality Virtual Clothes Try-On System by Yuan et al. (10.1109/TMM.2013.2280560) | 1        | 1,39%         |
| <b>Interviews</b>                                                                       |          |               |
| semi-structured                                                                         | 1        | 1,39%         |
| <b>Self-Reported / Diaries</b>                                                          | <b>1</b> | <b>1,39%</b>  |
| Self-reported data / Diaries                                                            | 1        | 1,39%         |
| <b>UX - Meaning</b>                                                                     | <b>8</b> | <b>11,11%</b> |
| <b>Questionnaire</b>                                                                    |          |               |
| adapted from previous/similar research                                                  |          |               |
| A Mixed Reality Virtual Clothes Try-On System by Yuan et al. (10.1109/TMM.2013.2280560) | 2        | 2,78%         |
| Technology Acceptance Model (TAM)                                                       |          |               |
| Unspecified                                                                             | 1        | 1,39%         |
| 7 Likert scale                                                                          | 1        | 1,39%         |
| custom-made                                                                             |          |               |
| 1 to 5 scale                                                                            | 1        | 1,39%         |
| <b>Interviews</b>                                                                       |          |               |
| structured                                                                              | 2        | 2,78%         |
| <b>Experts Review / Evaluation</b>                                                      |          |               |
| Heuristic evaluation                                                                    | 1        | 1,39%         |

|                                                                                         |           |               |
|-----------------------------------------------------------------------------------------|-----------|---------------|
| <b>UX - Usability</b>                                                                   | <b>28</b> | <b>38,89%</b> |
| <b>Questionnaire</b>                                                                    |           |               |
| Technology Acceptance Model (TAM)                                                       |           |               |
| 7 Likert scale                                                                          | 5         | 6,94%         |
| Unspecified                                                                             | 2         | 2,78%         |
| custom-made                                                                             |           |               |
| 5 Likert scale                                                                          | 5         | 6,94%         |
| adapted from previous/similar researches                                                |           |               |
| A Mixed Reality Virtual Clothes Try-On System by Yuan et al. (10.1109/TMM.2013.2280560) | 4         | 5,56%         |
| remote survey                                                                           |           |               |
| online survey                                                                           | 2         | 2,78%         |
| <b>Experts Review / Evaluation</b>                                                      |           |               |
| Heuristic evaluation                                                                    | 10        | 13,89%        |
| <b>UX - Usefulness</b>                                                                  | <b>4</b>  | <b>5,56%</b>  |
| <b>Questionnaire</b>                                                                    |           |               |
| Technology Acceptance Model (TAM)                                                       |           |               |
| Unspecified                                                                             | 1         | 1,39%         |
| 7 Likert scale                                                                          | 1         | 1,39%         |
| adapted from previous/similar researches                                                |           |               |
| A Mixed Reality Virtual Clothes Try-On System by Yuan et al. (10.1109/TMM.2013.2280560) | 1         | 1,39%         |
| remote survey                                                                           |           |               |
| online survey                                                                           | 1         | 1,39%         |



## Section B - Correlation charts

### Communication

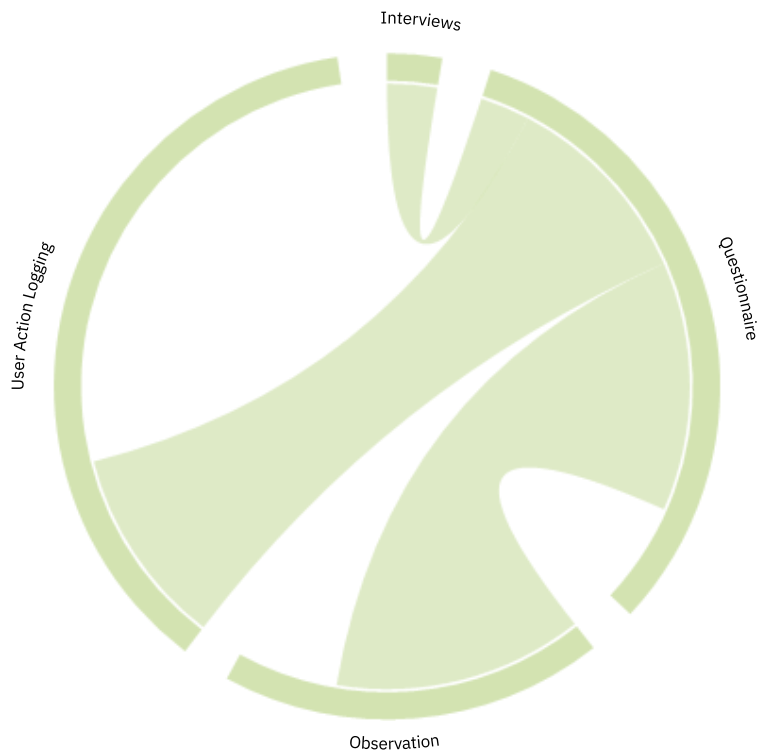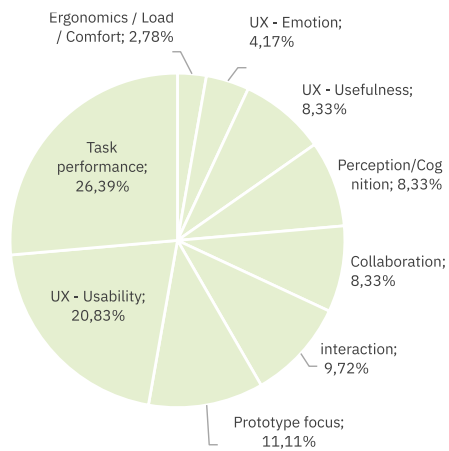

# Section C - Method Used & Aspects Matrix Communication

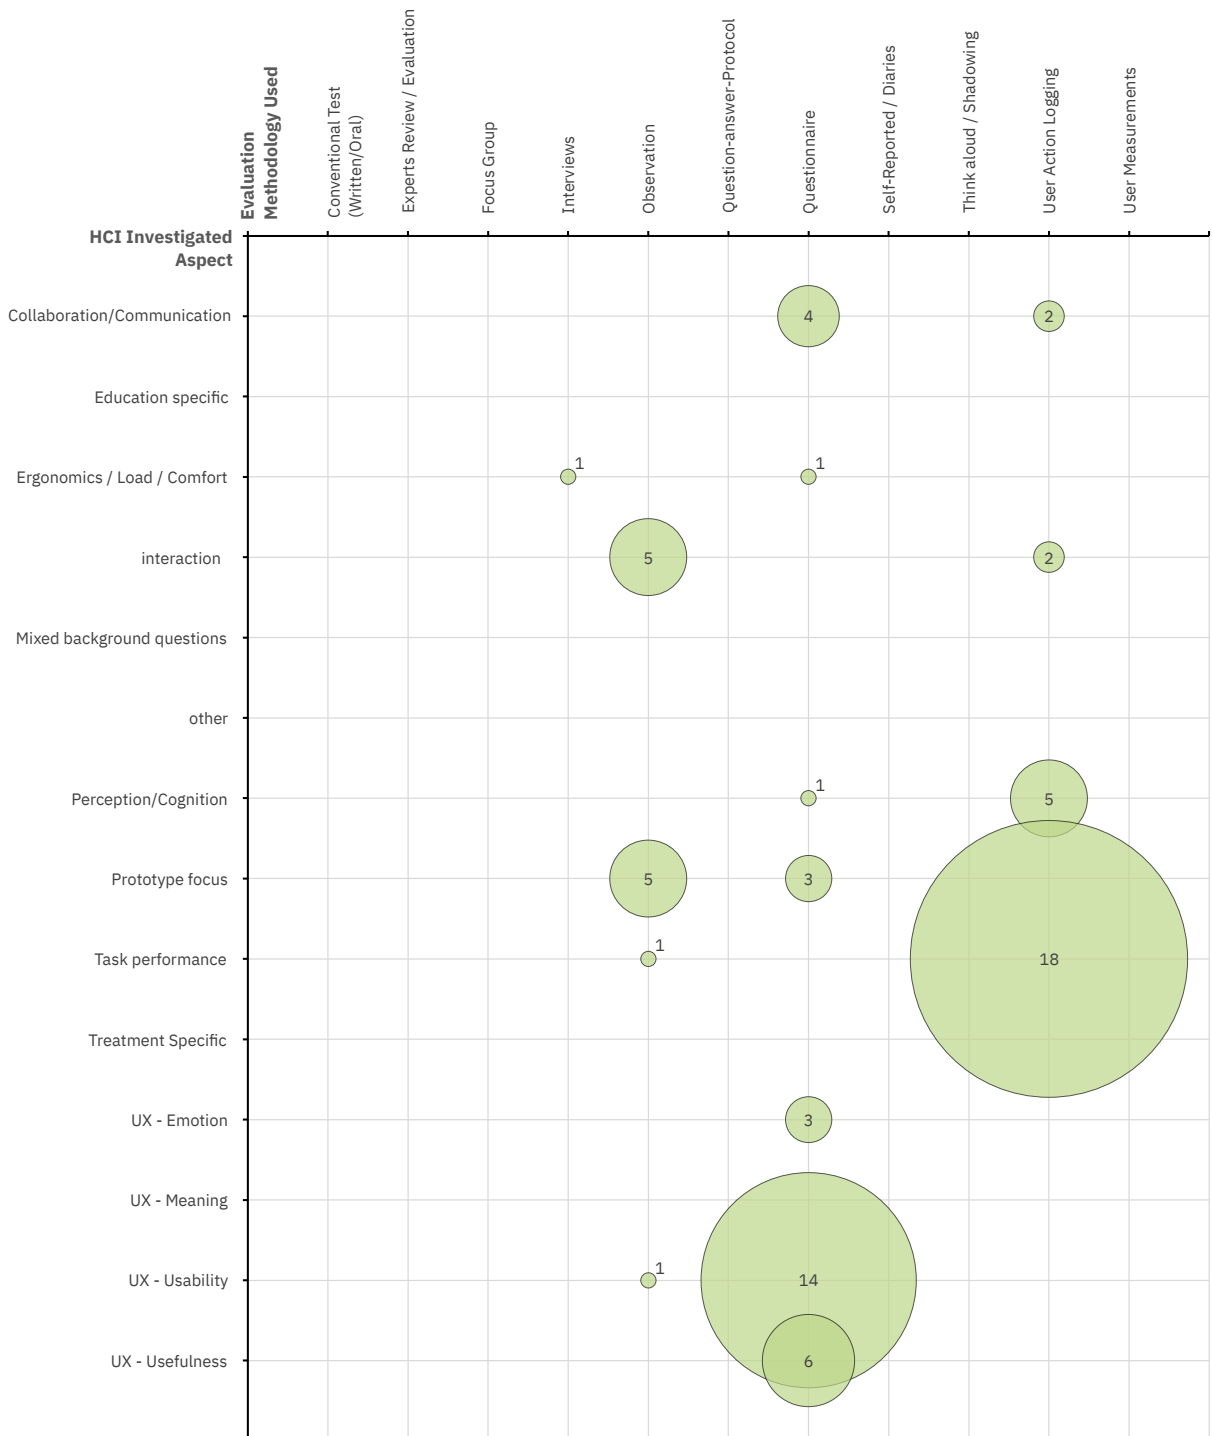

## Section D – Lookup Table: Communication

|                                     |           |               |
|-------------------------------------|-----------|---------------|
| <b>Collaboration/Communication</b>  | <b>6</b>  | <b>8,33%</b>  |
| <b>Questionnaire</b>                |           |               |
| custom-made                         |           |               |
| 7 Likert scale                      | 3         | 4,17%         |
| 1 to 7 scale bipolar scale          | 1         | 1,39%         |
| <b>User Action Logging</b>          |           |               |
| tracking logs                       | 2         | 2,78%         |
| <b>Ergonomics / Load / Comfort</b>  | <b>2</b>  | <b>2,78%</b>  |
| <b>Interviews</b>                   |           |               |
| closed response (during evaluation) | 1         | 1,39%         |
| <b>Questionnaire</b>                |           |               |
| custom-made                         |           |               |
| 1 to 3 scale                        | 1         | 1,39%         |
| <b>interaction</b>                  | <b>7</b>  | <b>9,72%</b>  |
| <b>Observation</b>                  |           |               |
| evaluators observations             | 5         | 6,94%         |
| <b>User Action Logging</b>          |           |               |
| tracking logs                       | 2         | 2,78%         |
| <b>Perception/Cognition</b>         | <b>6</b>  | <b>8,33%</b>  |
| <b>User Action Logging</b>          |           |               |
| evaluators count/measure            | 3         | 4,17%         |
| tracking logs                       | 1         | 1,39%         |
| evaluators timing                   | 1         | 1,39%         |
| <b>Questionnaire</b>                |           |               |
| custom-made                         |           |               |
| closed ended question/s             | 1         | 1,39%         |
| <b>Prototype focus</b>              | <b>8</b>  | <b>11,11%</b> |
| <b>Observation</b>                  |           |               |
| evaluators observations             | 4         | 5,56%         |
| comments collection during test     | 1         | 1,39%         |
| <b>Questionnaire</b>                |           |               |
| custom-made                         |           |               |
| open ended question/s               | 2         | 2,78%         |
| 7 Likert scale                      | 1         | 1,39%         |
| <b>Task performance</b>             | <b>19</b> | <b>26,39%</b> |

|                                                           |           |               |
|-----------------------------------------------------------|-----------|---------------|
| <b>User Action Logging</b>                                |           |               |
| tracking logs                                             | 15        | 20,83%        |
| evaluators count/measure                                  | 2         | 2,78%         |
| evaluators timing                                         | 1         | 1,39%         |
| <b>Observation</b>                                        |           |               |
| evaluators observations                                   | 1         | 1,39%         |
| <b>UX - Emotion</b>                                       | <b>3</b>  | <b>4,17%</b>  |
| <b>Questionnaire</b>                                      |           |               |
| custom-made                                               |           |               |
| 7 Likert scale                                            | 2         | 2,78%         |
| 3 Separate Propositions (disagree/neutral/strongly agree) | 1         | 1,39%         |
| <b>UX - Usability</b>                                     | <b>15</b> | <b>20,83%</b> |
| <b>Questionnaire</b>                                      |           |               |
| custom-made                                               |           |               |
| 7 Likert scale                                            | 7         | 9,72%         |
| order items                                               | 3         | 4,17%         |
| 1 to 5 scale                                              | 2         | 2,78%         |
| 3 Separate Propositions (disagree/neutral/strongly agree) | 1         | 1,39%         |
| open ended question/s                                     | 1         | 1,39%         |
| <b>Observation</b>                                        |           |               |
| evaluators observations                                   | 1         | 1,39%         |
| <b>UX - Usefulness</b>                                    | <b>6</b>  | <b>8,33%</b>  |
| <b>Questionnaire</b>                                      |           |               |
| custom-made                                               |           |               |
| 7 Likert scale                                            | 3         | 4,17%         |
| open ended question/s                                     | 2         | 2,78%         |
| 3 Separate Propositions (disagree/neutral/strongly agree) | 1         | 1,39%         |

## Section B - Correlation charts

### Cultural & Tourism

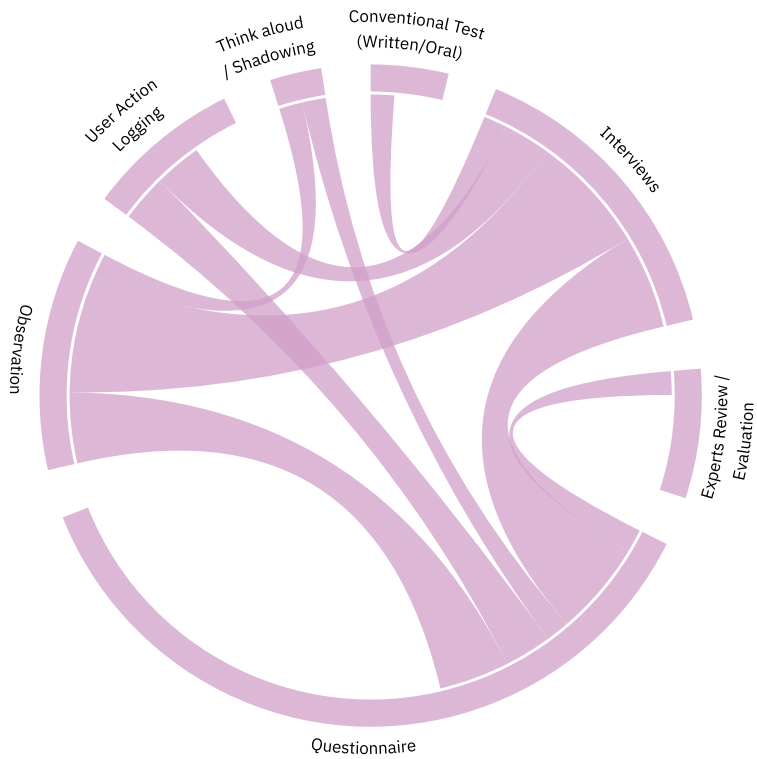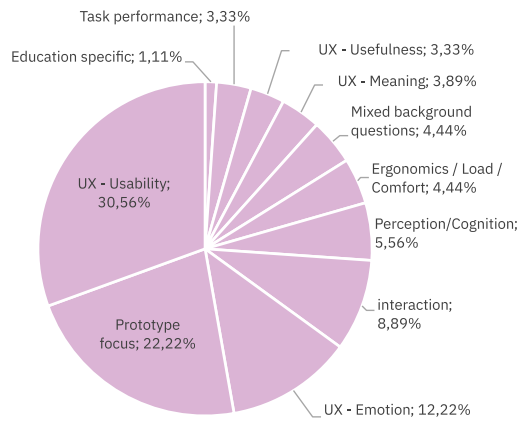

# Section C - Method Used & Aspects Matrix

## Cultural & Tourism

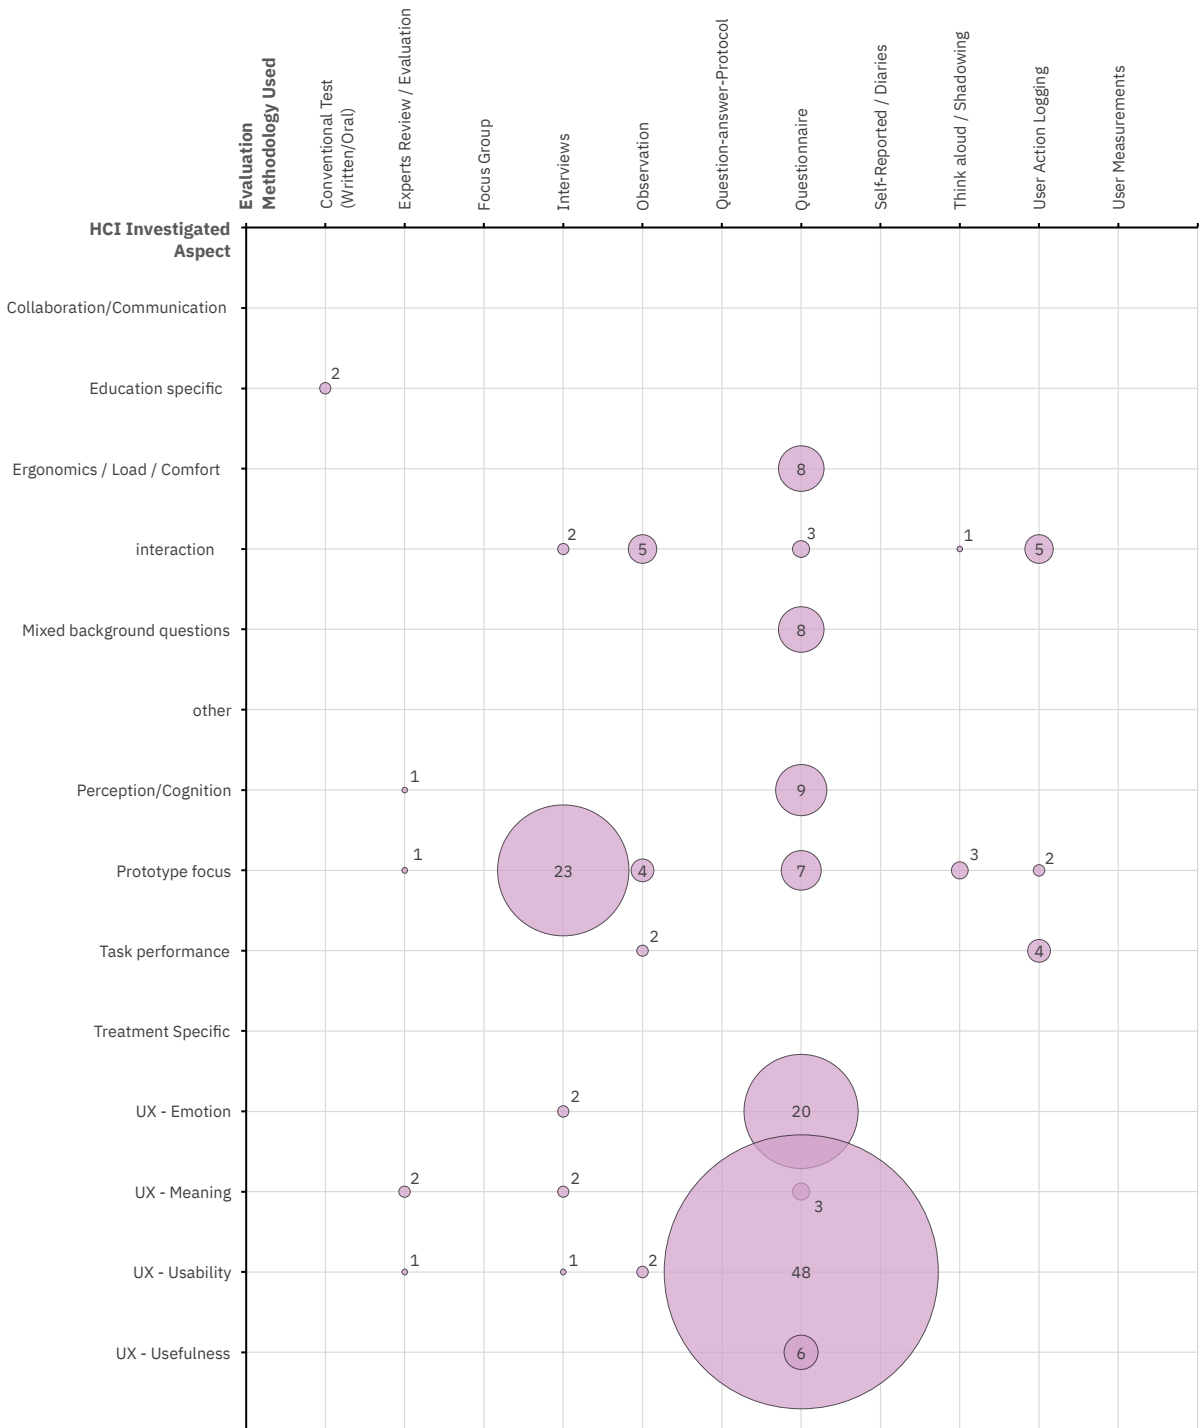

## Section D – Lookup Table: Cultural & Tourism

|                                                                                        |           |              |
|----------------------------------------------------------------------------------------|-----------|--------------|
| <b>Education specific</b>                                                              | <b>2</b>  | <b>1,11%</b> |
| <b>Conventional Test (Written/Oral)</b>                                                |           |              |
| test with evaluation given by teacher (PRE + Post -> Control + Experiment group)       | 1         | 0,56%        |
| test with evaluation given by teacher                                                  | 1         | 0,56%        |
| <b>Ergonomics / Load / Comfort</b>                                                     | <b>8</b>  | <b>4,44%</b> |
| <b>Questionnaire</b>                                                                   |           |              |
| NASA TLX                                                                               |           |              |
| 7 Likert                                                                               | 5         | 2,78%        |
| custom-made                                                                            |           |              |
| 5 Likert scale                                                                         | 2         | 1,11%        |
| Unified Theory of Acceptance and Use of Technology (UTAUT2)                            |           |              |
| 7 Likert scale                                                                         | 1         | 0,56%        |
| <b>interaction</b>                                                                     | <b>16</b> | <b>8,89%</b> |
| <b>User Action Logging</b>                                                             |           |              |
| system logs                                                                            | 5         | 2,78%        |
| <b>Observation</b>                                                                     |           |              |
| evaluators observations                                                                | 5         | 2,78%        |
| <b>Questionnaire</b>                                                                   |           |              |
| Technology Acceptance Model (TAM)                                                      |           |              |
| 7 Likert scale                                                                         | 2         | 1,11%        |
| Unified Theory of Acceptance and Use of Technology (UTAUT2)                            |           |              |
| 7 Likert scale                                                                         | 1         | 0,56%        |
| <b>Interviews</b>                                                                      |           |              |
| semi-structured                                                                        | 2         | 1,11%        |
| <b>Think aloud / Shadowing</b>                                                         |           |              |
| Think aloud on prototype                                                               | 1         | 0,56%        |
| <b>Mixed background questions</b>                                                      | <b>8</b>  | <b>4,44%</b> |
| <b>Questionnaire</b>                                                                   |           |              |
| custom-made                                                                            |           |              |
| closed ended question/s                                                                | 3         | 1,67%        |
| 1 to 5 scale                                                                           | 2         | 1,11%        |
| opposite adjectives (1 to 4 scale)                                                     | 1         | 0,56%        |
| Technology Acceptance Model (TAM)                                                      |           |              |
| 7 Likert scale                                                                         | 1         | 0,56%        |
| adapted from previous/similar research                                                 |           |              |
| The Development and Evaluation of a Survey to Measure User Engagement - 5 Likert scale | 1         | 0,56%        |

|                                                  |           |               |
|--------------------------------------------------|-----------|---------------|
| <b>Perception/Cognition</b>                      | <b>10</b> | <b>5,56%</b>  |
| <hr/>                                            |           |               |
| <b>Questionnaire</b>                             |           |               |
| custom-made                                      |           |               |
| 7 Likert scale                                   | 2         | 1,11%         |
| opposite adjectives (1 to 4 scale)               | 1         | 0,56%         |
| 5 Likert scale                                   | 1         | 0,56%         |
| presence questionnaire                           |           |               |
| Regenbrecht and Schubert (2002) - 7 Likert scale | 4         | 2,22%         |
| Santa Barbara Sense of Direction (SBSOD)         | 1         | 0,56%         |
| <b>Experts Review / Evaluation</b>               |           |               |
| Heuristic evaluation                             | 1         | 0,56%         |
| <b>Prototype focus</b>                           | <b>40</b> | <b>22,22%</b> |
| <hr/>                                            |           |               |
| <b>Interviews</b>                                |           |               |
| semi-structured                                  |           |               |
| open ended question/s                            | 9         | 5,00%         |
| unspecified                                      | 5         | 2,78%         |
| recorded                                         | 2         | 1,11%         |
| unstructured                                     | 5         | 2,78%         |
| remote interview                                 |           |               |
| semi-structured phone interview                  | 1         | 0,56%         |
| structured                                       |           |               |
| Close-Ended Questions                            | 1         | 0,56%         |
| <b>Questionnaire</b>                             |           |               |
| custom-made                                      |           |               |
| 1 to 5 scale                                     | 4         | 2,22%         |
| 7 Likert scale                                   | 2         | 1,11%         |
| 5 Likert scale                                   | 1         | 0,56%         |
| <b>Observation</b>                               |           |               |
| evaluators observations                          |           |               |
| unspecified                                      | 3         | 1,67%         |
| on material recorded                             | 1         | 0,56%         |
| <b>Think aloud / Shadowing</b>                   |           |               |
| Think aloud on task                              |           |               |
| unspecified                                      | 2         | 1,11%         |
| Think aloud on prototype                         |           |               |
| unspecified                                      | 1         | 0,56%         |
| <b>User Action Logging</b>                       |           |               |
| system logs                                      |           |               |
| unspecified                                      | 2         | 1,11%         |

|                                                                                        |           |               |
|----------------------------------------------------------------------------------------|-----------|---------------|
| <b>Experts Review / Evaluation</b>                                                     |           |               |
| Heuristic evaluation                                                                   | 1         | 0,56%         |
| <b>Task performance</b>                                                                | <b>6</b>  | <b>3,33%</b>  |
| <hr/>                                                                                  |           |               |
| <b>User Action Logging</b>                                                             |           |               |
| system logs                                                                            | 4         | 2,22%         |
| <b>Observation</b>                                                                     |           |               |
| evaluators coded/structured observations                                               |           |               |
| on material recorded                                                                   | 2         | 1,11%         |
| <b>UX - Emotion</b>                                                                    | <b>22</b> | <b>12,22%</b> |
| <hr/>                                                                                  |           |               |
| <b>Questionnaire</b>                                                                   |           |               |
| custom-made                                                                            |           |               |
| 1 to 5 scale                                                                           | 4         | 2,22%         |
| 5 Likert scale                                                                         | 4         | 2,22%         |
| opposite adjectives (1 to 4 scale)                                                     | 2         | 1,11%         |
| 7 Likert scale                                                                         | 2         | 1,11%         |
| Unified Theory of Acceptance and Use of Technology (UTAUT2)                            |           |               |
| 7 Likert scale                                                                         | 4         | 2,22%         |
| adapted from previous/similar research                                                 |           |               |
| The Development and Evaluation of a Survey to Measure User Engagement - 5 Likert scale | 2         | 1,11%         |
| Technology Acceptance Model (TAM)                                                      |           |               |
| 7 Likert scale                                                                         | 2         | 1,11%         |
| <b>Interviews</b>                                                                      |           |               |
| semi-structured                                                                        |           |               |
| recorded                                                                               | 1         | 0,56%         |
| open ended question/s                                                                  | 1         | 0,56%         |
| <b>UX - Meaning</b>                                                                    | <b>7</b>  | <b>3,89%</b>  |
| <hr/>                                                                                  |           |               |
| <b>Questionnaire</b>                                                                   |           |               |
| custom-made                                                                            |           |               |
| opposite adjectives (1 to 4 scale)                                                     | 1         | 0,56%         |
| 5 Likert scale                                                                         | 1         | 0,56%         |
| Unified Theory of Acceptance and Use of Technology (UTAUT2)                            |           |               |
| 7 Likert scale                                                                         | 1         | 0,56%         |
| <b>Experts Review / Evaluation</b>                                                     |           |               |
| Experts Interview                                                                      | 2         | 1,11%         |
| <b>Interviews</b>                                                                      |           |               |
| semi-structured                                                                        |           |               |
| open ended question/s                                                                  | 2         | 1,11%         |

|                                                                                        |           |               |
|----------------------------------------------------------------------------------------|-----------|---------------|
| <b>UX - Usability</b>                                                                  | <b>55</b> | <b>30,56%</b> |
| <b>Questionnaire</b>                                                                   |           |               |
| custom-made                                                                            |           |               |
| 5 Likert scale                                                                         | 18        | 10,00%        |
| 1 to 5 scale                                                                           | 5         | 2,78%         |
| opposite adjectives (1 to 4 scale)                                                     | 3         | 1,67%         |
| 7 Likert scale                                                                         | 3         | 1,67%         |
| closed ended question/s                                                                | 1         | 0,56%         |
| Technology Acceptance Model (TAM)                                                      |           |               |
| 7 Likert scale                                                                         | 4         | 2,22%         |
| Ben Schneiderman's acceptance test                                                     |           |               |
| 5 Likert scale                                                                         | 3         | 1,67%         |
| System Usability Scale (SUS)                                                           |           |               |
| 5 Likert scale                                                                         | 3         | 1,67%         |
| presence questionnaire                                                                 |           |               |
| Regenbrecht and Schubert (2002) - 7 Likert scale                                       | 3         | 1,67%         |
| adapted from previous/similar research                                                 |           |               |
| The Development and Evaluation of a Survey to Measure User Engagement - 5 Likert scale | 3         | 1,67%         |
| Unified Theory of Acceptance and Use of Technology (UTAUT2)                            |           |               |
| 7 Likert scale                                                                         | 1         | 0,56%         |
| NASA TLX                                                                               |           |               |
| 7 Likert                                                                               | 1         | 0,56%         |
| <b>N/D</b>                                                                             |           |               |
| N/D                                                                                    | 3         | 1,67%         |
| <b>Observation</b>                                                                     |           |               |
| evaluators observations                                                                | 2         | 1,11%         |
| <b>Experts Review / Evaluation</b>                                                     |           |               |
| Heuristic evaluation                                                                   | 1         | 0,56%         |
| <b>Inter-views</b>                                                                     |           |               |
| semi-structured                                                                        | 1         | 0,56%         |
| <b>UX - Usefulness</b>                                                                 | <b>6</b>  | <b>3,33%</b>  |
| <b>Questionnaire</b>                                                                   |           |               |
| custom-made                                                                            |           |               |
| 5 Likert scale                                                                         | 2         | 1,11%         |
| 1 to 5 scale                                                                           | 1         | 0,56%         |
| Technology Acceptance Model (TAM)                                                      |           |               |
| 7 Likert scale                                                                         | 2         | 1,11%         |
| System Usability Scale (SUS)                                                           |           |               |
| 5 Likert scale                                                                         | 1         | 0,56%         |

## Section B - Correlation charts

### Education & Training

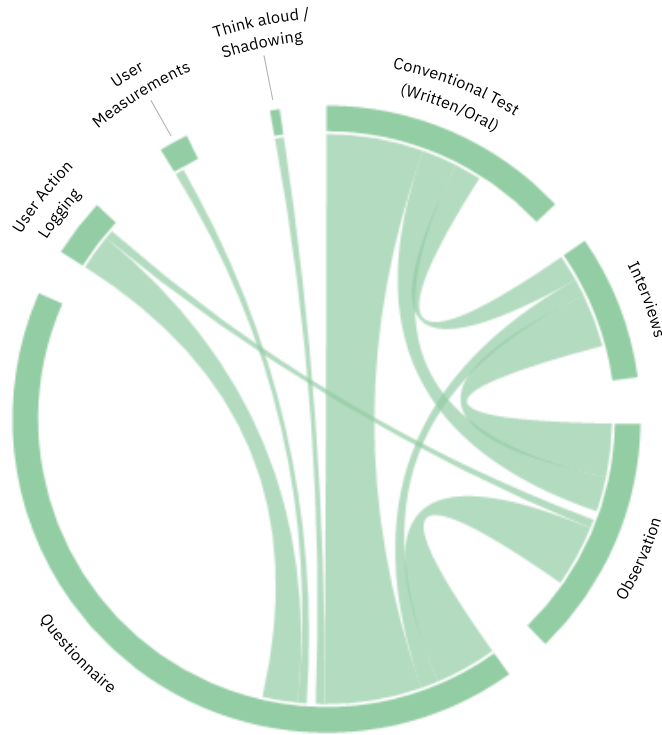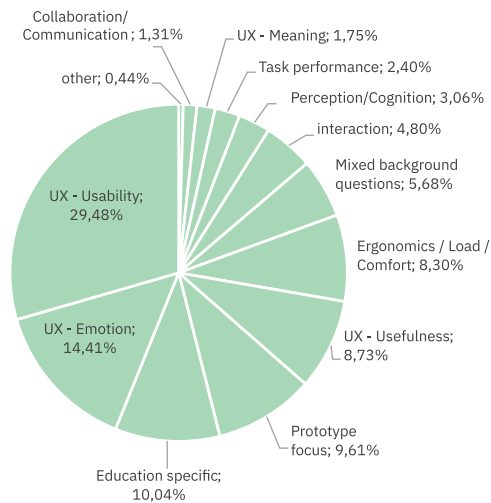

# Section C - Method Used & Aspects Matrix Education & Training

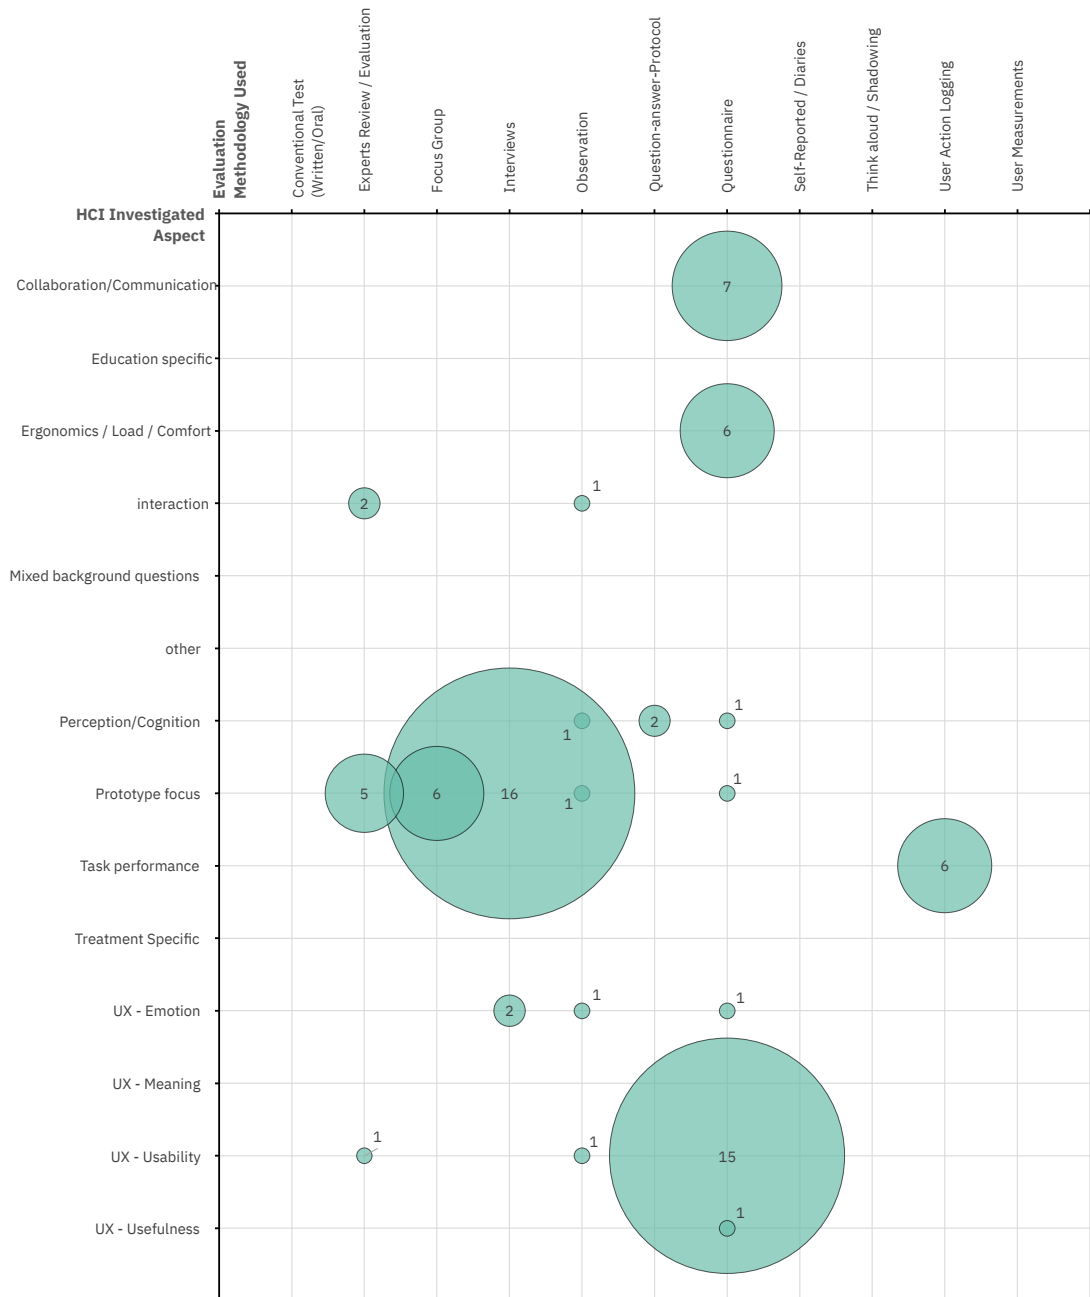

## Section D – Lookup Table: Education & Training

|                                                                                  |           |               |
|----------------------------------------------------------------------------------|-----------|---------------|
| <b>Collaboration/Communication</b>                                               | <b>6</b>  | <b>1,31%</b>  |
| <b>Observation</b>                                                               |           |               |
| evaluators coded/structured observations                                         | 3         | 0,66%         |
| <b>Questionnaire</b>                                                             |           |               |
| Computer-Mediated Collaborative Learning: An Empirical Evaluation                |           |               |
| 5 Likert scale                                                                   | 3         | 0,66%         |
| <b>Education specific</b>                                                        | <b>46</b> | <b>10,04%</b> |
| <b>Conventional Test (Written/Oral)</b>                                          |           |               |
| test with evaluation given by teacher                                            | 8         | 1,75%         |
| test with evaluation given by teacher (Control + Experiment groups)              | 7         | 1,53%         |
| test with evaluation given by teacher (PRE + POST evaluation)                    | 6         | 1,31%         |
| test with evaluation given by teacher (PRE + Post -> Control + Experiment group) | 3         | 0,66%         |
| <b>Questionnaire</b>                                                             |           |               |
| custom-made                                                                      |           |               |
| graded questions                                                                 | 10        | 2,18%         |
| 5 Likert scale                                                                   | 1         | 0,22%         |
| 6 Likert scale                                                                   | 1         | 0,22%         |
| Flow experience questionnaire by Chang et al. (2012)                             |           |               |
| 5 Likert scale                                                                   | 2         | 0,44%         |
| Education specific Questionnaire                                                 |           |               |
| Pintrich's Motivated Strategies for Learning Questionnaire (MSLQ)                | 1         | 0,22%         |
| <b>Observation</b>                                                               |           |               |
| evaluators observations                                                          |           |               |
| on material recorded                                                             | 2         | 0,44%         |
| unspecified                                                                      | 2         | 0,44%         |
| evaluators coded/structured observations                                         | 2         | 0,44%         |
| <b>Interviews</b>                                                                |           |               |
| semi-structured                                                                  | 1         | 0,22%         |
| <b>Ergonomics / Load / Comfort</b>                                               | <b>38</b> | <b>8,30%</b>  |
| <b>Questionnaire</b>                                                             |           |               |
| Wearability Levels (WL) scale Knight et al.                                      |           |               |
| Visual Effects scales (VES) - 1 to 5 scale                                       | 6         | 1,31%         |
| comfort rating scales (CRS) - 1 to 5 scale                                       | 6         | 1,31%         |
| Borg RPE - 1 to 5 scale                                                          | 1         | 0,22%         |
| Borg-CR10 - 1 to 5 scale                                                         | 1         | 0,22%         |
| custom-made                                                                      |           |               |
| 5 Likert scale                                                                   | 5         | 1,09%         |

|                                                                                                        |           |              |
|--------------------------------------------------------------------------------------------------------|-----------|--------------|
| 6 Likert scale                                                                                         | 1         | 0,22%        |
| Intrinsic Motivation Inventory (IMI)                                                                   |           |              |
| 5 Likert scale                                                                                         | 1         | 0,22%        |
| Likert 7 scale                                                                                         | 1         | 0,22%        |
| 7 Likert polar terms scale                                                                             | 1         | 0,22%        |
| QUIM (Quality In Use Integrated Measurement)                                                           | 2         | 0,44%        |
| Education specific Questionnaire                                                                       |           |              |
| Learning Attitude towards Ecosystems (LATE) - 5 Likert scale                                           | 1         | 0,22%        |
| based on The ebb and flow of online learning by Pearce (10.1016/j.chb.2004.02.019)<br>- 5 Likert scale | 1         | 0,22%        |
| Flow State Scale (FSS)                                                                                 |           |              |
| 5 Likert scale                                                                                         | 2         | 0,44%        |
| Questionnaire for User Interface and Satisfaction (QUIS)                                               |           |              |
| 12 Likert scale                                                                                        | 1         | 0,22%        |
| Bipolar Laddering (BLA system)                                                                         | 1         | 0,22%        |
| <b>Interviews</b>                                                                                      |           |              |
| structured                                                                                             | 5         | 1,09%        |
| NASA TLX                                                                                               | 5         | 1,09%        |
| <b>User Measurements</b>                                                                               |           |              |
| Heart Rate Variability (HRV)                                                                           | 2         | 0,44%        |
| <b>interaction</b>                                                                                     | <b>22</b> | <b>4,80%</b> |
| <b>Observation</b>                                                                                     | <b>11</b> | <b>2,40%</b> |
| evaluators observations                                                                                | 6         | 1,31%        |
| evaluators coded/structured observations                                                               | 5         | 1,09%        |
| unspecified                                                                                            | 4         | 0,87%        |
| on material recorded                                                                                   | 1         | 0,22%        |
| <b>Questionnaire</b>                                                                                   |           |              |
| custom-made                                                                                            |           |              |
| 5 Likert scale                                                                                         | 3         | 0,66%        |
| 7 Likert scale                                                                                         | 2         | 0,44%        |
| Flow State Scale (FSS)                                                                                 |           |              |
| 5 Likert scale                                                                                         | 1         | 0,22%        |
| Technology Acceptance Model (TAM)                                                                      |           |              |
| Unspecified                                                                                            | 1         | 0,22%        |
| Education specific Questionnaire                                                                       |           |              |
| Keller's Instructional Materials Motivation Survey (IMMS)                                              | 1         | 0,22%        |
| <b>Think aloud / Shadowing</b>                                                                         |           |              |
| Think aloud on prototype                                                                               | 2         | 0,44%        |

## Interviews

|                                                                               |           |              |
|-------------------------------------------------------------------------------|-----------|--------------|
| with proxy users                                                              |           |              |
| semi-structured                                                               | 1         | 0,22%        |
| <b>Mixed background questions</b>                                             | <b>26</b> | <b>5,68%</b> |
| <b>Questionnaire</b>                                                          |           |              |
| custom-made                                                                   |           |              |
| closed ended question/s                                                       | 10        | 2,18%        |
| 5 Likert scale                                                                | 2         | 0,44%        |
| 7 Likert scale                                                                | 2         | 0,44%        |
| graded questions                                                              | 1         | 0,22%        |
| 1 to 6 scale                                                                  | 1         | 0,22%        |
| Intrinsic Motivation Inventory (IMI)                                          |           |              |
| 5 Likert scale                                                                | 1         | 0,22%        |
| Computer-Mediated Collaborative Learning: An Empirical Evaluation             |           |              |
| 5 Likert scale                                                                | 1         | 0,22%        |
| remote survey                                                                 |           |              |
| email survey - closed question/s                                              | 1         | 0,22%        |
| System Usability Scale (SUS)                                                  |           |              |
| 5 Likert scale                                                                | 1         | 0,22%        |
| Bipolar Laddering (BLA system)                                                | 1         | 0,22%        |
| Flow experience questionnaire by Chang et al. (2012)                          |           |              |
| 5 Likert scale                                                                | 1         | 0,22%        |
| <b>Interviews</b>                                                             |           |              |
| later coded                                                                   |           |              |
| structured evaluation from evaluators with 1 to 5 scale                       | 2         | 0,44%        |
| <b>Observation</b>                                                            |           |              |
| evaluators observations                                                       | 2         | 0,44%        |
| <b>other</b>                                                                  | <b>2</b>  | <b>0,44%</b> |
| <b>Self-Reported / Diaries</b>                                                |           |              |
| Participants artefacts (notebooks, emails, drawings, produced materials etc.) | 2         | 0,44%        |
| <b>Perception/Cognition</b>                                                   |           |              |
| <b>Questionnaire</b>                                                          |           |              |
| custom-made                                                                   |           |              |
| 5 Likert scale                                                                | 8         | 1,75%        |
| presence questionnaire                                                        |           |              |
| by Slater et al. (1994) - reduced version                                     | 2         | 0,44%        |
| Flow State Scale (FSS)                                                        |           |              |
| 5 Likert scale                                                                | 2         | 0,44%        |

|                                              |           |              |
|----------------------------------------------|-----------|--------------|
| <b>Interviews</b>                            |           |              |
| with proxy users                             |           |              |
| structured                                   | 1         | 0,22%        |
| semi-structured                              | 1         | 0,22%        |
| <b>Prototype focus</b>                       | <b>44</b> | <b>9,61%</b> |
| <hr/>                                        |           |              |
| <b>Questionnaire</b>                         |           |              |
| custom-made                                  |           |              |
| open ended question/s                        | 12        | 2,62%        |
| closed ended question/s                      | 3         | 0,66%        |
| 5 Likert scale                               | 3         | 0,66%        |
| 7 Likert scale                               | 1         | 0,22%        |
| remote survey                                |           |              |
| email survey - closed question/s             | 3         | 0,66%        |
| <b>Interviews</b>                            |           |              |
| with proxy users                             |           |              |
| unstructured - informal                      | 3         | 0,66%        |
| structured                                   | 3         | 0,66%        |
| semi-structured                              | 2         | 0,44%        |
| un-structured                                | 2         | 0,44%        |
| semi-structured                              | 4         | 0,87%        |
| later coded                                  |           |              |
| unstructured interview later coded in topics | 1         | 0,22%        |
| <b>Observation</b>                           | <b>6</b>  | <b>1,31%</b> |
| evaluators observations                      | 3         | 0,66%        |
| evaluators coded/structured observations     | 2         | 0,44%        |
| on material recorded                         | 1         | 0,22%        |
| comments collection during test              | 1         | 0,22%        |
| <b>Think aloud / Shadowing</b>               | <b>1</b>  | <b>0,22%</b> |
| Think aloud on prototype                     | 1         | 0,22%        |
| <b>Task performance</b>                      | <b>11</b> | <b>2,40%</b> |
| <hr/>                                        |           |              |
| <b>User Action Logging</b>                   |           |              |
| evaluators count/measure                     | 5         | 1,09%        |
| evaluators timing                            |           |              |
| unspecified                                  | 2         | 0,44%        |
| on material recorded                         | 1         | 0,22%        |
| system logs                                  | 2         | 0,44%        |
| <b>Observation</b>                           |           |              |
| evaluators coded/structured observations     |           |              |
| on material recorded                         | 1         | 0,22%        |

|                                                                                                                                                        |           |               |
|--------------------------------------------------------------------------------------------------------------------------------------------------------|-----------|---------------|
| <b>UX - Emotion</b>                                                                                                                                    | <b>66</b> | <b>14,41%</b> |
| <b>Questionnaire</b>                                                                                                                                   |           |               |
| custom-made                                                                                                                                            |           |               |
| 5 Likert scale                                                                                                                                         | 8         | 1,75%         |
| 7 Likert scale                                                                                                                                         | 6         | 1,31%         |
| closed ended question/s                                                                                                                                | 3         | 0,66%         |
| open ended question/s                                                                                                                                  | 2         | 0,44%         |
| Likert 4                                                                                                                                               | 1         | 0,22%         |
| Education specific Questionnaire                                                                                                                       |           |               |
| adapted from Evaluating the Usability of an Augmented Reality Based Educational Application by Aleven et al. (10.1007/978-3-642-13388-6 34) (Likert 5) | 4         | 0,87%         |
| Keller's Instructional Materials Motivation Survey (IMMS)                                                                                              | 2         | 0,44%         |
| Learning Attitude towards Ecosystems (LATE) - 5 Likert scale                                                                                           | 1         | 0,22%         |
| Intrinsic Motivation Inventory (IMI)                                                                                                                   |           |               |
| 5 Likert scale                                                                                                                                         | 2         | 0,44%         |
| Likert 7 scale                                                                                                                                         | 1         | 0,22%         |
| 7 Likert polar terms scale                                                                                                                             | 1         | 0,22%         |
| Bipolar Laddering (BLA system)                                                                                                                         | 4         | 0,87%         |
| Flow State Scale (FSS)                                                                                                                                 |           |               |
| 5 Likert scale                                                                                                                                         | 3         | 0,66%         |
| Technology Acceptance Model (TAM)                                                                                                                      |           |               |
| Unspecified                                                                                                                                            | 3         | 0,66%         |
| QUIM (Quality In Use Integrated Measurement)                                                                                                           | 2         | 0,44%         |
| Questionnaire for User Interface and Satisfaction (QUIS)                                                                                               |           |               |
| 8 Likert scale                                                                                                                                         | 1         | 0,22%         |
| 10 Likert scale                                                                                                                                        | 1         | 0,22%         |
| Post-Study System Usability Questionnaire (PSSUQ)                                                                                                      | 1         | 0,22%         |
| System Usability Scale (SUS)                                                                                                                           | 1         | 0,22%         |
| remote survey                                                                                                                                          |           |               |
| email survey - closed question/s                                                                                                                       | 1         | 0,22%         |
| ISO 9241                                                                                                                                               |           |               |
| ISONORM part 10 - 5 Likert                                                                                                                             | 1         | 0,22%         |
| <b>Interviews</b>                                                                                                                                      |           |               |
| with proxy users                                                                                                                                       |           |               |
| semi-structured                                                                                                                                        | 3         | 0,66%         |
| structured                                                                                                                                             | 1         | 0,22%         |
| later coded                                                                                                                                            |           |               |
| unstructured interview later coded in topics                                                                                                           | 2         | 0,44%         |
| structured                                                                                                                                             | 2         | 0,44%         |
|                                                                                                                                                        | <b>8</b>  | <b>1,75%</b>  |

|                                                                                                                                                        |            |               |
|--------------------------------------------------------------------------------------------------------------------------------------------------------|------------|---------------|
| <b>Observation</b>                                                                                                                                     |            |               |
| evaluators coded/structured observations                                                                                                               | 7          | 1,53%         |
| on material recorded                                                                                                                                   | 4          | 0,87%         |
| evaluators observations                                                                                                                                | 1          | 0,22%         |
| <b>User Measurements</b>                                                                                                                               |            |               |
| Galvanic Skin Response (GSR)                                                                                                                           | 1          | 0,22%         |
| <b>UX - Meaning</b>                                                                                                                                    | <b>8</b>   | <b>1,75%</b>  |
| <b>Questionnaire</b>                                                                                                                                   |            |               |
| custom-made                                                                                                                                            |            |               |
| 7 Likert scale                                                                                                                                         | 6          | 1,31%         |
| Technology Acceptance Model (TAM)                                                                                                                      |            |               |
| Unspecified                                                                                                                                            | 1          | 0,22%         |
| <b>Interviews</b>                                                                                                                                      |            |               |
| later coded                                                                                                                                            |            |               |
| unstructured interview later coded in topics                                                                                                           | 1          | 0,22%         |
| <b>UX - Usability</b>                                                                                                                                  | <b>135</b> | <b>29,48%</b> |
| <b>Questionnaire</b>                                                                                                                                   |            |               |
| custom-made                                                                                                                                            |            |               |
| 5 Likert scale                                                                                                                                         | 22         | 4,80%         |
| 7 Likert scale                                                                                                                                         | 6          | 1,31%         |
| open ended question/s                                                                                                                                  | 4          | 0,87%         |
| 1 to 10 scale                                                                                                                                          | 4          | 0,87%         |
| Likert 4                                                                                                                                               | 2          | 0,44%         |
| closed ended question/s                                                                                                                                | 2          | 0,44%         |
| 6 Likert scale                                                                                                                                         | 2          | 0,44%         |
| 1 to 5 scale                                                                                                                                           | 1          | 0,22%         |
| ISO 9241                                                                                                                                               |            |               |
| part 11                                                                                                                                                | 19         | 4,15%         |
| ISONORM part 10 - 5 Likert                                                                                                                             | 7          | 1,53%         |
| Education specific Questionnaire                                                                                                                       |            |               |
| adapted from Evaluating the Usability of an Augmented Reality Based Educational Application by Aleven et al. (10.1007/978-3-642-13388-6 34) (Likert 5) | 6          | 1,31%         |
| Keller's Instructional Materials Motivation Survey (IMMS)                                                                                              | 1          | 0,22%         |
| Learning Attitude towards Ecosystems (LATE) - 5 Likert scale                                                                                           | 1          | 0,22%         |
| based on The ebb and flow of online learning by Pearce (10.1016/j.chb.2004.02.019) - 5 Likert scale                                                    | 1          | 0,22%         |
| Technology Acceptance Model (TAM)                                                                                                                      |            |               |
| Unspecified                                                                                                                                            | 6          | 1,31%         |
| 7 Likert scale                                                                                                                                         | 1          | 0,22%         |
| System Usability Scale (SUS)                                                                                                                           |            |               |

|                                                                   |           |              |
|-------------------------------------------------------------------|-----------|--------------|
| 5 Likert scale                                                    | 3         | 0,66%        |
| Unspecified                                                       | 2         | 0,44%        |
| QUIM (Quality In Use Integrated Measurement)                      | 5         | 1,09%        |
| Post-Study System Usability Questionnaire (PSSUQ)                 |           |              |
| Unspecified                                                       | 3         | 0,66%        |
| 7 Likert scale                                                    | 2         | 0,44%        |
| Bipolar Laddering (BLA system)                                    | 4         | 0,87%        |
| Intrinsic Motivation Inventory (IMI)                              |           |              |
| 5 Likert scale                                                    | 2         | 0,44%        |
| Likert 7 scale                                                    | 1         | 0,22%        |
| 7 Likert polar terms scale                                        | 1         | 0,22%        |
| Usability Satisfaction Questionnaires                             |           |              |
| 5 Likert scale                                                    | 4         | 0,87%        |
| Questionnaire for User Interface and Satisfaction (QUIS)          |           |              |
| 6 Likert scale                                                    | 1         | 0,22%        |
| 5 Likert scale                                                    | 1         | 0,22%        |
| 11 Likert scale                                                   | 1         | 0,22%        |
| 13 Likert scale                                                   | 1         | 0,22%        |
| Flow State Scale (FSS)                                            |           |              |
| 5 Likert scale                                                    | 3         | 0,66%        |
| Computer-Mediated Collaborative Learning: An Empirical Evaluation |           |              |
| 5 Likert scale                                                    | 2         | 0,44%        |
| <b>Interviews</b>                                                 |           |              |
| later coded                                                       |           |              |
| unstructured interview later coded in topics                      | 3         | 0,66%        |
| with proxy users                                                  |           |              |
| semi-structured                                                   | 3         | 0,66%        |
| structured                                                        |           |              |
| Unspecified                                                       | 2         | 0,44%        |
| NASA TLX                                                          | 1         | 0,22%        |
| <b>Observation</b>                                                |           |              |
| evaluators coded/structured observations                          |           |              |
| Unspecified                                                       | 2         | 0,44%        |
| on material recorded                                              | 1         | 0,22%        |
| evaluators observations                                           | 1         | 0,22%        |
| <b>User Action Logging</b>                                        |           |              |
| system logs                                                       | 1         | 0,22%        |
|                                                                   | <b>40</b> | <b>8,73%</b> |

## UX - Usefulness

### Questionnaire

|                                                                                                                                                        |   |       |
|--------------------------------------------------------------------------------------------------------------------------------------------------------|---|-------|
| custom-made                                                                                                                                            |   |       |
| 5 Likert scale                                                                                                                                         | 9 | 1,97% |
| closed ended question/s                                                                                                                                | 3 | 0,66% |
| open ended question/s                                                                                                                                  | 1 | 0,22% |
| Likert 4                                                                                                                                               | 1 | 0,22% |
| 1 to 10 scale                                                                                                                                          | 1 | 0,22% |
| 1 to 5 scale                                                                                                                                           | 1 | 0,22% |
| Technology Acceptance Model (TAM)                                                                                                                      |   |       |
| Unspecified                                                                                                                                            | 3 | 0,66% |
| 7 Likert scale                                                                                                                                         | 1 | 0,22% |
| Education specific Questionnaire                                                                                                                       |   |       |
| adapted from Evaluating the Usability of an Augmented Reality Based Educational Application by Alevén et al. (10.1007/978-3-642-13388-6 34) (Likert 5) | 2 | 0,44% |
| Learning Attitude towards Ecosystems (LATE) - 5 Likert scale                                                                                           | 1 | 0,22% |
| Intrinsic Motivation Inventory (IMI)                                                                                                                   |   |       |
| Likert 7 scale                                                                                                                                         | 1 | 0,22% |
| 7 Likert polar terms scale                                                                                                                             | 1 | 0,22% |
| Usability Satisfaction Questionnaires                                                                                                                  |   |       |
| 5 Likert scale                                                                                                                                         | 2 | 0,44% |
| Questionnaire for User Interface and Satisfaction (QUIS)                                                                                               |   |       |
| 9 Likert scale                                                                                                                                         | 1 | 0,22% |
| 7 Likert scale                                                                                                                                         | 1 | 0,22% |
| Post-Study System Usability Questionnaire (PSSUQ)                                                                                                      |   |       |
| 7 Likert scale                                                                                                                                         | 1 | 0,22% |
| Unspecified                                                                                                                                            | 1 | 0,22% |
| ISO 9241                                                                                                                                               |   |       |
| part 11                                                                                                                                                | 1 | 0,22% |
| Bipolar Laddering (BLA system)                                                                                                                         | 1 | 0,22% |
| QUIM (Quality In Use Integrated Measurement)                                                                                                           | 1 | 0,22% |
| System Usability Scale (SUS)                                                                                                                           |   |       |
| 5 Likert scale                                                                                                                                         | 1 | 0,22% |

### Interviews

|                         |   |       |
|-------------------------|---|-------|
| with proxy users        |   |       |
| semi-structured         | 2 | 0,44% |
| unstructured - informal | 1 | 0,22% |
| structured              | 1 | 0,22% |
| semi-structured         | 1 | 0,22% |

## Section B - Correlation charts

### Entertainment

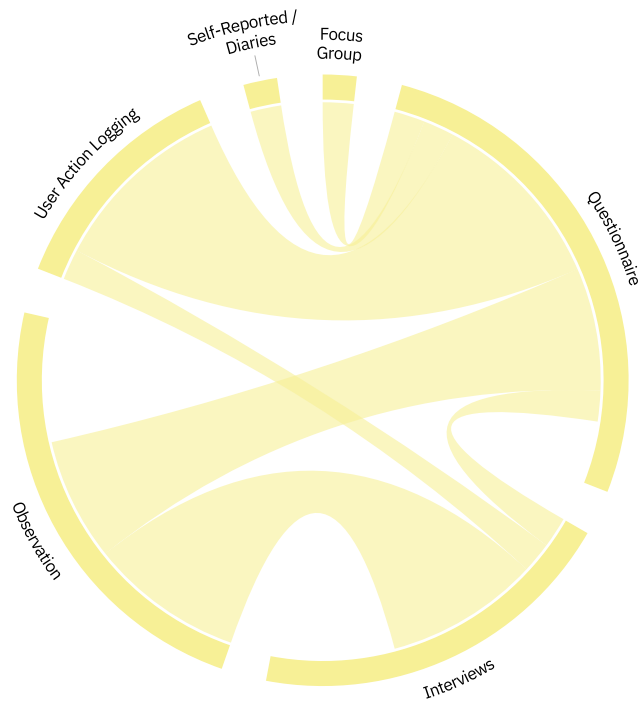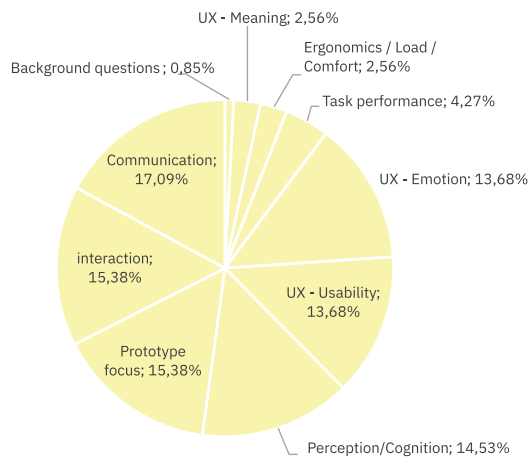

# Section C - Method Used & Aspects Matrix Entertainment

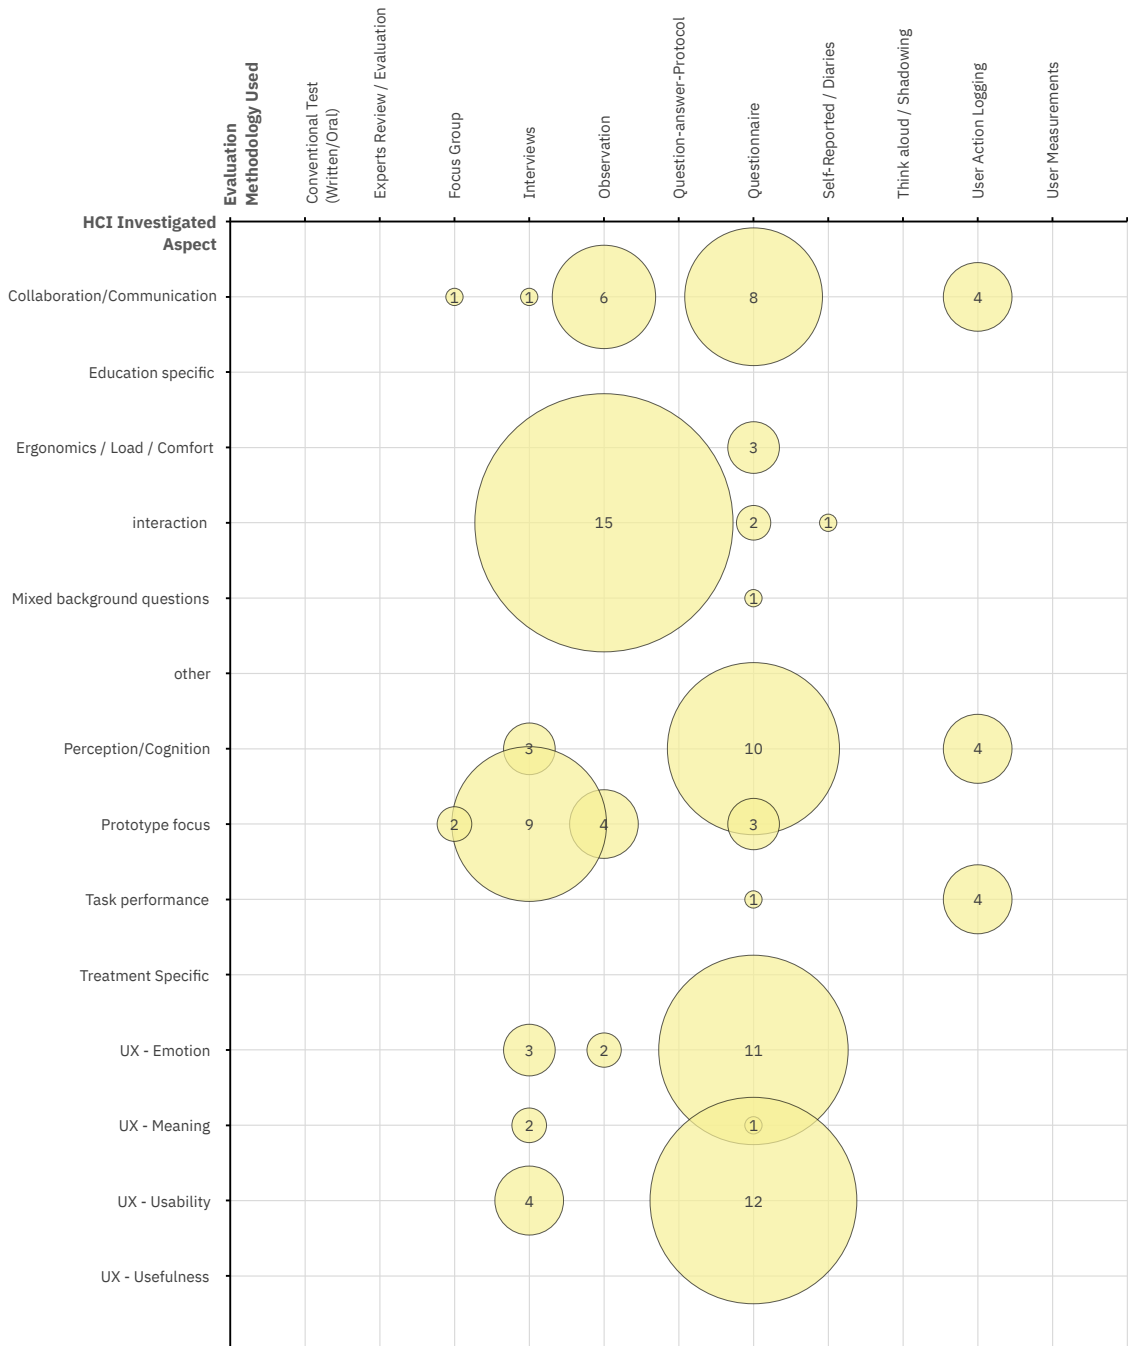

## Section D – Lookup Table: Entertainment

|                                                                               |           |               |
|-------------------------------------------------------------------------------|-----------|---------------|
| <b>Collaboration/Communication</b>                                            | <b>20</b> | <b>17,09%</b> |
| <b>Questionnaire</b>                                                          |           |               |
| custom-made                                                                   |           |               |
| 7 Likert scale                                                                | 4         | 3,42%         |
| 5 Likert scale                                                                | 4         | 3,42%         |
| <b>Observation</b>                                                            |           |               |
| evaluators observations                                                       |           |               |
| on material recorded                                                          | 2         | 1,71%         |
| unspecified                                                                   | 2         | 1,71%         |
| evaluators coded/structured observations                                      | 2         | 1,71%         |
| <b>User Action Logging</b>                                                    |           |               |
| system logs                                                                   | 4         | 3,42%         |
| <b>Focus Group</b>                                                            |           |               |
| Post-test focus group                                                         | 1         | 0,85%         |
| <b>Interviews</b>                                                             |           |               |
| semi-structured                                                               | 1         | 0,85%         |
| <b>Ergonomics / Load / Comfort</b>                                            | <b>3</b>  | <b>2,56%</b>  |
| <b>Questionnaire</b>                                                          |           |               |
| custom-made                                                                   |           |               |
| 5 Likert scale                                                                | 2         | 1,71%         |
| 1 to 7 scale                                                                  | 1         | 0,85%         |
| <b>interaction</b>                                                            | <b>18</b> | <b>15,38%</b> |
| <b>Observation</b>                                                            |           |               |
| evaluators observations                                                       |           |               |
| unspecified                                                                   | 7         | 5,98%         |
| on material recorded                                                          | 5         | 4,27%         |
| evaluators coded/structured observations                                      |           |               |
| on material recorded                                                          | 3         | 2,56%         |
| <b>Questionnaire</b>                                                          |           |               |
| GameFlow questionnaire                                                        |           |               |
| Likert Ordinal scale                                                          | 1         | 0,85%         |
| custom-made                                                                   |           |               |
| 5 Likert scale                                                                | 1         | 0,85%         |
| <b>Self-Reported / Diaries</b>                                                |           |               |
| Participants artefacts (notebooks, emails, drawings, produced materials etc.) | 1         | 0,85%         |

|                                         |           |               |
|-----------------------------------------|-----------|---------------|
| <b>Mixed background questions</b>       | <b>1</b>  | <b>0,85%</b>  |
| <b>Questionnaire</b>                    |           |               |
| custom-made                             |           |               |
| closed ended question/s                 | 1         | 0,85%         |
| <b>Perception/Cognition</b>             | <b>17</b> | <b>14,53%</b> |
| <b>Questionnaire</b>                    |           |               |
| custom-made                             |           |               |
| 5 Likert scale                          | 3         | 2,56%         |
| open ended question/s                   | 2         | 1,71%         |
| 1 to 7 scale                            | 2         | 1,71%         |
| closed response multi-item              | 1         | 0,85%         |
| 7 Likert scale                          | 1         | 0,85%         |
| presence questionnaire                  |           |               |
| MEC-SPQ - Likert Ordinal                | 1         | 0,85%         |
| <b>User Action Logging</b>              |           |               |
| system logs                             | 4         | 3,42%         |
| <b>Interviews</b>                       |           |               |
| semi-structured                         | 3         | 2,56%         |
| <b>Prototype focus</b>                  | <b>18</b> | <b>15,38%</b> |
| <b>Interviews</b>                       |           |               |
| unstructured                            | 5         | 4,27%         |
| semi-structured                         | 2         | 1,71%         |
| unstructured post-experiment discussion | 1         | 0,85%         |
| structured                              | 1         | 0,85%         |
| <b>Observation</b>                      |           |               |
| evaluators observations                 | 4         | 3,42%         |
| <b>Questionnaire</b>                    |           |               |
| custom-made                             |           |               |
| open ended question/s                   | 2         | 1,71%         |
| 5 Likert scale                          | 1         | 0,85%         |
| <b>Focus Group</b>                      |           |               |
| Post-test focus group                   | 2         | 1,71%         |
| <b>Task performance</b>                 | <b>5</b>  | <b>4,27%</b>  |
| <b>User Action Logging</b>              |           |               |
| system logs                             | 3         | 2,56%         |
| evaluators timing                       | 1         | 0,85%         |
| <b>Questionnaire</b>                    |           |               |
| custom-made                             |           |               |
| graded questions                        | 1         | 0,85%         |

|                                          |           |               |
|------------------------------------------|-----------|---------------|
| <b>UX - Emotion</b>                      | <b>16</b> | <b>13,68%</b> |
| <b>Questionnaire</b>                     |           |               |
| custom-made                              |           |               |
| 7 Likert scale                           | 5         | 4,27%         |
| 5 Likert scale                           | 2         | 1,71%         |
| 1 to 7 scale                             | 1         | 0,85%         |
| System Usability Scale (SUS)             | 2         | 1,71%         |
| Intrinsic Motivation Inventory (IMI)     | 1         | 0,85%         |
| Likert Ordinal scale                     | 1         | 0,85%         |
| <b>Interviews</b>                        |           |               |
| unstructured                             | 2         | 1,71%         |
| unstructured post-experiment discussion  | 1         | 0,85%         |
| <b>Observation</b>                       |           |               |
| evaluators observations                  |           |               |
| on material recorded                     | 1         | 0,85%         |
| evaluators coded/structured observations |           |               |
| on material recorded                     | 1         | 0,85%         |
| <b>UX - Meaning</b>                      | <b>3</b>  | <b>2,56%</b>  |
| <b>Interviews</b>                        |           |               |
| semi-structured                          |           |               |
| recorded                                 | 2         | 1,71%         |
| <b>Questionnaire</b>                     |           |               |
| custom-made                              |           |               |
| 7 Likert scale                           | 1         | 0,85%         |
| <b>UX - Usability</b>                    | <b>16</b> | <b>13,68%</b> |
| <b>Questionnaire</b>                     |           |               |
| custom-made                              |           |               |
| 5 Likert scale                           | 5         | 4,27%         |
| 7 Likert scale                           | 2         | 1,71%         |
| open ended question/s                    | 1         | 0,85%         |
| closed ended question/s                  | 1         | 0,85%         |
| System Usability Scale (SUS)             | 3         | 2,56%         |
| <b>Interviews</b>                        |           |               |
| unstructured post-experiment discussion  | 2         | 1,71%         |
| semi-structured                          | 2         | 1,71%         |



## Section B - Correlation charts

### Field Operations

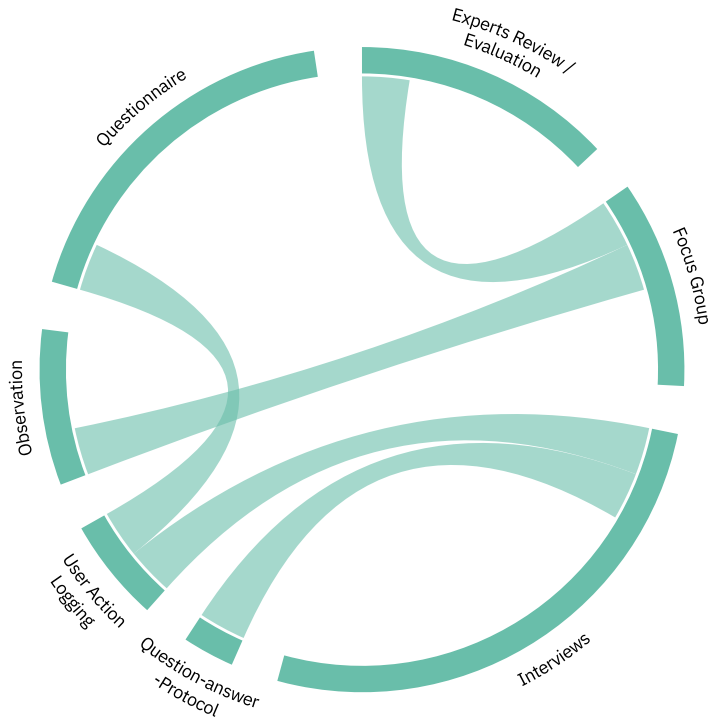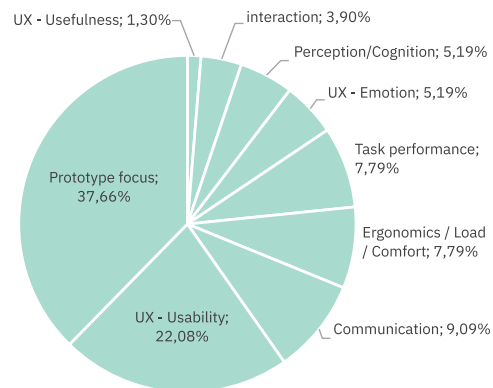

# Section C - Method Used & Aspects Matrix

## Field Operations

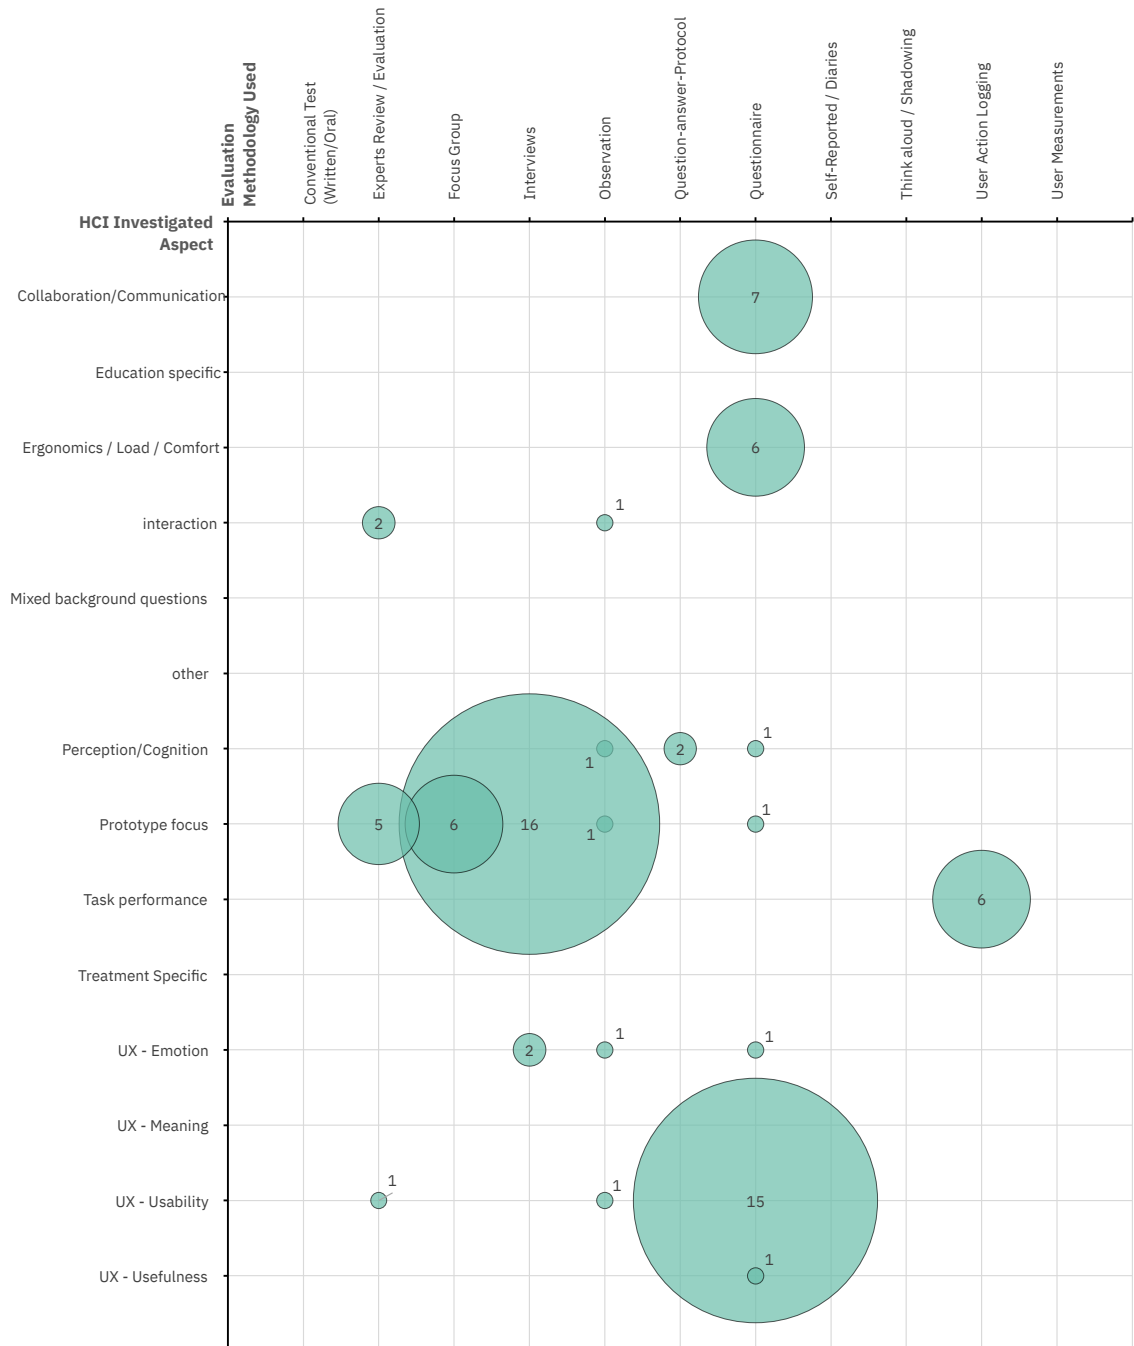

## Section D – Lookup Table: Field Operations

|                                                                                                                         |           |               |
|-------------------------------------------------------------------------------------------------------------------------|-----------|---------------|
| <b>Collaboration/Communication</b>                                                                                      | <b>7</b>  | <b>9,09%</b>  |
| <b>Questionnaire</b>                                                                                                    |           |               |
| Education specific Questionnaire                                                                                        |           |               |
| Evaluation method for computer supported collaborative learning (CSCL) by Spada et al. <sup>1</sup> - 5 Likert          | 7         | 9,09%         |
| <b>Ergonomics / Load / Comfort</b>                                                                                      | <b>6</b>  | <b>7,79%</b>  |
| <b>Questionnaire</b>                                                                                                    |           |               |
| NASA TLX                                                                                                                |           |               |
| 7 Likert                                                                                                                | 5         | 6,49%         |
| Perceived Usefulness, Perceived Ease of Use, and User Acceptance of Information Technology by D. Davis (10.2307/249008) |           |               |
| 5 Likert scale                                                                                                          | 1         | 1,30%         |
| <b>interaction</b>                                                                                                      | <b>3</b>  | <b>3,90%</b>  |
| <b>Experts Review / Evaluation</b>                                                                                      |           |               |
| Cognitive Walkthrough                                                                                                   | 2         | 2,60%         |
| <b>Observation</b>                                                                                                      |           |               |
| evaluators observations                                                                                                 | 1         | 1,30%         |
| <b>Perception/Cognition</b>                                                                                             | <b>4</b>  | <b>5,19%</b>  |
| <b>Question-answer-Protocol</b>                                                                                         |           |               |
| open response (during evaluation)                                                                                       | 1         | 1,30%         |
| closed response (during evaluation)                                                                                     | 1         | 1,30%         |
| <b>Observation</b>                                                                                                      |           |               |
| evaluators observations                                                                                                 |           |               |
| on material recorded                                                                                                    | 1         | 1,30%         |
| <b>Questionnaire</b>                                                                                                    |           |               |
| custom-made                                                                                                             |           |               |
| 7 Likert scale                                                                                                          | 1         | 1,30%         |
| <b>Prototype focus</b>                                                                                                  | <b>29</b> | <b>37,66%</b> |
| <b>Interviews</b>                                                                                                       |           |               |
| unstructured post-experiment discussion                                                                                 | 11        | 14,29%        |
| unstructured                                                                                                            | 3         | 3,90%         |
| structured                                                                                                              | 2         | 2,60%         |
| <b>Focus Group</b>                                                                                                      |           |               |
| Post-test focus group                                                                                                   | 6         | 7,79%         |
| <b>Experts Review / Evaluation</b>                                                                                      |           |               |

|                                                                                                                         |           |               |
|-------------------------------------------------------------------------------------------------------------------------|-----------|---------------|
| Heuristic evaluation                                                                                                    | 3         | 3,90%         |
| Tasks analysis                                                                                                          | 1         | 1,30%         |
| Cognitive Walkthrough                                                                                                   | 1         | 1,30%         |
| <b>Observation</b>                                                                                                      |           |               |
| evaluators observations                                                                                                 | 1         | 1,30%         |
| <b>Questionnaire</b>                                                                                                    |           |               |
| custom-made                                                                                                             |           |               |
| 7 Likert scale                                                                                                          | 1         | 1,30%         |
| <b>Task performance</b>                                                                                                 | <b>6</b>  | <b>7,79%</b>  |
| <b>User Action Logging</b>                                                                                              |           |               |
| system logs                                                                                                             | 3         | 3,90%         |
| tracking logs                                                                                                           | 1         | 1,30%         |
| evaluators count/measure                                                                                                | 1         | 1,30%         |
| evaluators timing                                                                                                       | 1         | 1,30%         |
| <b>UX - Emotion</b>                                                                                                     | <b>4</b>  | <b>5,19%</b>  |
| <b>Interviews</b>                                                                                                       |           |               |
| unstructured post-experiment discussion                                                                                 | 2         | 2,60%         |
| <b>Questionnaire</b>                                                                                                    |           |               |
| custom-made                                                                                                             |           |               |
| 7 Likert scale                                                                                                          | 1         | 1,30%         |
| <b>Observation</b>                                                                                                      |           |               |
| evaluators observations                                                                                                 | 1         | 1,30%         |
| <b>UX - Usability</b>                                                                                                   | <b>17</b> | <b>22,08%</b> |
| <b>Questionnaire</b>                                                                                                    | <b>15</b> | <b>19,48%</b> |
| Perceived Usefulness, Perceived Ease of Use, and User Acceptance of Information Technology by D. Davis (10.2307/249008) |           |               |
| 5 Likert scale                                                                                                          | 8         | 10,39%        |
| custom-made                                                                                                             | 6         | 7,79%         |
| 7 Likert scale                                                                                                          |           |               |
| NASA TLX                                                                                                                | 1         | 1,30%         |
| 7 Likert                                                                                                                |           |               |
| <b>Experts Review / Evaluation</b>                                                                                      |           |               |
| Heuristic evaluation                                                                                                    | 1         | 1,30%         |
| <b>Observation</b>                                                                                                      |           |               |
| evaluators observations                                                                                                 | 1         | 1,30%         |
| <b>UX - Usefulness</b>                                                                                                  | <b>1</b>  | <b>1,30%</b>  |
| <b>Questionnaire</b>                                                                                                    |           |               |
| custom-made                                                                                                             |           |               |
| 7 Likert scale                                                                                                          | 1         | 1,30%         |

## Section B - Correlation charts

### Generic Interface

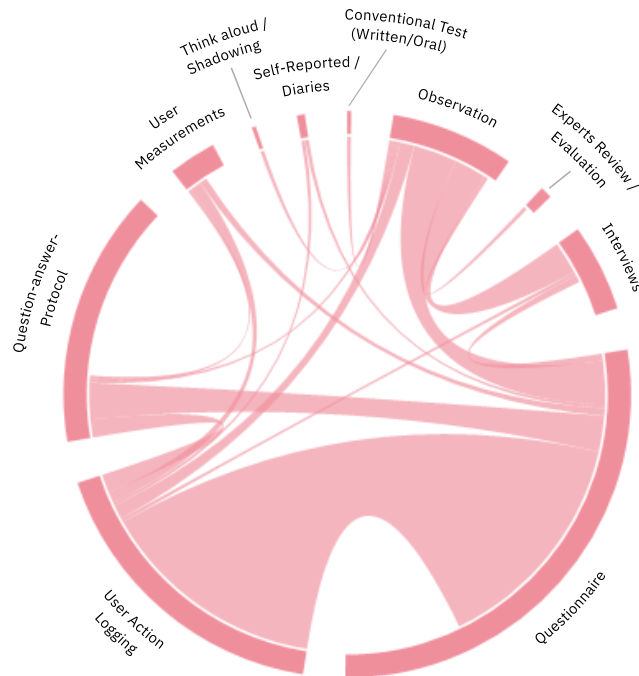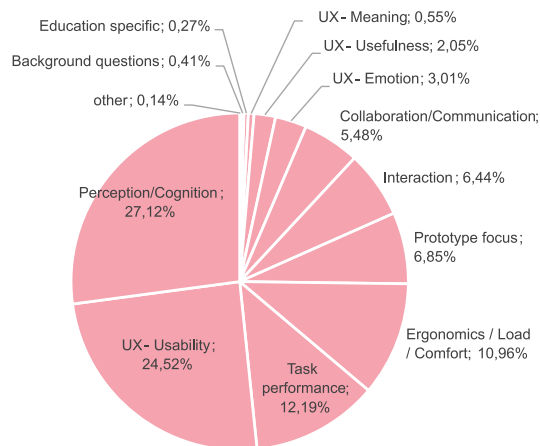

# Section C - Method Used & Aspects Matrix

## Generic Interface

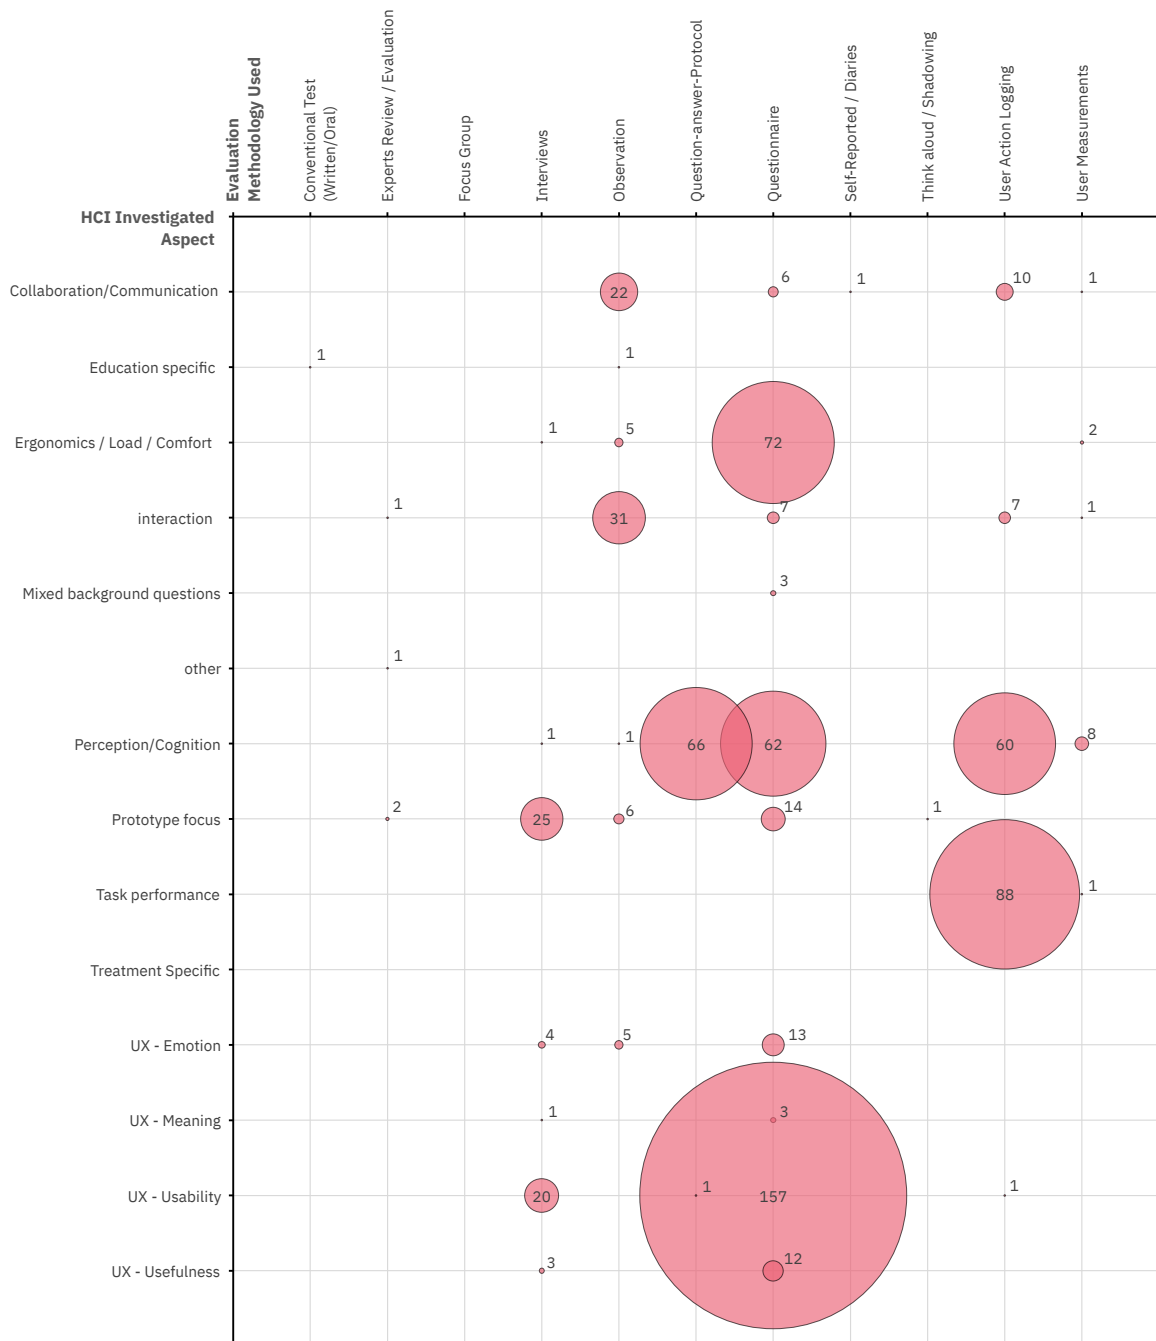

## Section D – Lookup Table: Generic Interface

|                                                                                                                                                                                                       |           |               |
|-------------------------------------------------------------------------------------------------------------------------------------------------------------------------------------------------------|-----------|---------------|
| <b>Collaboration/Communication</b>                                                                                                                                                                    | <b>40</b> | <b>5,49%</b>  |
| <b>Observation</b>                                                                                                                                                                                    |           |               |
| evaluators coded/structured observations                                                                                                                                                              | 12        | 1,65%         |
| on material recorded                                                                                                                                                                                  | 7         | 0,96%         |
| unspecified                                                                                                                                                                                           | 5         | 0,69%         |
| evaluators observations                                                                                                                                                                               |           |               |
| unspecified                                                                                                                                                                                           | 7         | 0,96%         |
| on material recorded                                                                                                                                                                                  | 3         | 0,41%         |
| <b>User Action Logging</b>                                                                                                                                                                            |           |               |
| tracking logs                                                                                                                                                                                         | 5         | 0,69%         |
| system logs                                                                                                                                                                                           | 5         | 0,69%         |
| <b>Questionnaire</b>                                                                                                                                                                                  |           |               |
| custom-made                                                                                                                                                                                           |           |               |
| 10 Likert scale                                                                                                                                                                                       | 2         | 0,27%         |
| 1 to 7 scale                                                                                                                                                                                          | 1         | 0,14%         |
| adapted from previous/similar research                                                                                                                                                                |           |               |
| Rico and Brewster. Usable gestures for mobile interfaces: evaluating social acceptability                                                                                                             | 2         | 0,27%         |
| Some Advantages of Video Conferencing Over High-quality Audio Conferencing: Fluency and Awareness of Attentional Focus. By Daly-Jones et al. (10.1006/ijhc.1998.0195) - 1 to 7 scale with polar terms | 1         | 0,14%         |
| <b>User Measurements</b>                                                                                                                                                                              |           |               |
| eye tracking                                                                                                                                                                                          | 1         | 0,14%         |
| <b>Self-Reported / Diaries</b>                                                                                                                                                                        |           |               |
| Participant's artefacts (notebooks, emails, drawings, produced materials etc.)                                                                                                                        | 1         | 0,14%         |
| <b>Education specific</b>                                                                                                                                                                             | <b>2</b>  | <b>0,27%</b>  |
| <b>Conventional Test (Written/Oral)</b>                                                                                                                                                               |           |               |
| test with evaluation given by teacher                                                                                                                                                                 | 1         | 0,14%         |
| <b>Observation</b>                                                                                                                                                                                    |           |               |
| evaluators observations                                                                                                                                                                               |           |               |
| on material recorded                                                                                                                                                                                  | 1         | 0,14%         |
| <b>Ergonomics / Load / Comfort</b>                                                                                                                                                                    | <b>80</b> | <b>10,97%</b> |
| <b>Questionnaire</b>                                                                                                                                                                                  |           |               |
| custom-made                                                                                                                                                                                           |           |               |
| 7 Likert scale                                                                                                                                                                                        | 19        | 2,61%         |
| 5 Likert scale                                                                                                                                                                                        | 10        | 1,37%         |
| closed response multi-item                                                                                                                                                                            | 3         | 0,41%         |
| order items                                                                                                                                                                                           | 3         | 0,41%         |
| 9 Likert scale                                                                                                                                                                                        | 2         | 0,27%         |
| open comments                                                                                                                                                                                         | 1         | 0,14%         |

|                                          |           |              |
|------------------------------------------|-----------|--------------|
| closed ended question/s                  | 1         | 0,14%        |
| NASA TLX                                 |           |              |
| 100 scale                                | 11        | 1,51%        |
| RTLX version (Raw)- 100 scale            | 5         | 0,69%        |
| Unspecified                              | 5         | 0,69%        |
| 7 Likert                                 | 5         | 0,69%        |
| modify Likert                            | 4         | 0,55%        |
| ISO 9241                                 |           |              |
| part 9 - 2000(E)                         | 2         | 0,27%        |
| Simulator Sickness Questionnaire (SSQ)   |           |              |
| 5 Likert scale                           | 1         | 0,14%        |
| <b>Observation</b>                       |           |              |
| evaluators observations                  |           |              |
| unspecified                              | 4         | 0,55%        |
| on material recorded                     | 1         | 0,14%        |
| <b>User Measurements</b>                 |           |              |
| Heart Rate Variability (HRV)             | 1         | 0,14%        |
| Galvanic Skin Response (GSR)             | 1         | 0,14%        |
| <b>Interviews</b>                        |           |              |
| structured                               |           |              |
| based on SIE's ease of use               | 1         | 0,14%        |
| <b>interaction</b>                       | <b>47</b> | <b>6,45%</b> |
| <b>Observation</b>                       |           |              |
| evaluators observations                  | 19        | 2,61%        |
| unspecified                              | 13        | 1,78%        |
| on material recorded                     | 6         | 0,82%        |
| evaluators coded/structured observations |           |              |
| on material recorded                     | 9         | 1,23%        |
| unspecified                              | 3         | 0,41%        |
| <b>User Action Logging</b>               |           |              |
| evaluators count/measure                 |           |              |
| on material recorded                     | 4         | 0,55%        |
| system logs                              | 1         | 0,14%        |
| tracking logs                            | 1         | 0,14%        |
| evaluators timing                        |           |              |
| on material recorded                     | 1         | 0,14%        |

|                                                                                                              |            |               |
|--------------------------------------------------------------------------------------------------------------|------------|---------------|
| <b>Questionnaire</b>                                                                                         |            |               |
| custom-made                                                                                                  |            |               |
| 7 Likert scale                                                                                               | 2          | 0,27%         |
| Unspecified                                                                                                  | 1          | 0,14%         |
| adapted from previous/similar research                                                                       |            |               |
| Emotional intensity: Measurement and theoretical implications by Bachorowski & Braaten (1994) - 1 to 5 scale | 2          | 0,27%         |
| Questionnaire for User Interface and Satisfaction (QUIS)                                                     |            |               |
| 7 Likert                                                                                                     | 1          | 0,14%         |
| presence questionnaire                                                                                       |            |               |
| by Witmer and Singer (1998) - 7 Likert                                                                       | 1          | 0,14%         |
| <b>Experts Review / Evaluation</b>                                                                           |            |               |
| Tasks analysis                                                                                               | 1          | 0,14%         |
| <b>User Measurements</b>                                                                                     |            |               |
| eye tracking                                                                                                 | 1          | 0,14%         |
| <b>Mixed background questions</b>                                                                            | <b>3</b>   | <b>0,41%</b>  |
| <hr/>                                                                                                        |            |               |
| <b>Questionnaire</b>                                                                                         |            |               |
| custom-made                                                                                                  |            |               |
| closed ended question/s                                                                                      | 2          | 0,27%         |
| Unspecified                                                                                                  | 1          | 0,14%         |
| <b>N/D</b>                                                                                                   | <b>1</b>   | <b>0,14%</b>  |
| <hr/>                                                                                                        |            |               |
| <b>Questionnaire</b>                                                                                         |            |               |
| custom-made                                                                                                  |            |               |
| Unspecified                                                                                                  | 1          | 0,14%         |
| <b>other</b>                                                                                                 | <b>1</b>   | <b>0,14%</b>  |
| <hr/>                                                                                                        |            |               |
| <b>Experts Review / Evaluation</b>                                                                           |            |               |
| Tasks analysis                                                                                               | 1          | 0,14%         |
| <b>Perception/Cognition</b>                                                                                  | <b>198</b> | <b>27,16%</b> |
| <hr/>                                                                                                        |            |               |
| <b>Question-answer-Protocol</b>                                                                              | <b>66</b>  | <b>9,05%</b>  |
| open response (during evaluation)                                                                            | 45         | 6,17%         |
| closed response (during evaluation)                                                                          | 17         | 2,33%         |
| Virtual element finding / matching                                                                           | 4          | 0,55%         |
| <b>Questionnaire</b>                                                                                         | <b>62</b>  | <b>8,50%</b>  |
| custom-made                                                                                                  |            |               |
| 7 Likert scale                                                                                               | 14         | 1,92%         |
| open ended question/s                                                                                        | 7          | 0,96%         |
| 5 Likert scale                                                                                               | 7          | 0,96%         |
| -3 to +3 scale                                                                                               | 5          | 0,69%         |
| closed ended question/s                                                                                      | 4          | 0,55%         |
| 1 to 5 scale                                                                                                 | 4          | 0,55%         |
| 10 Likert scale                                                                                              | 3          | 0,41%         |

|                                                                                                                                                                                                       |          |              |
|-------------------------------------------------------------------------------------------------------------------------------------------------------------------------------------------------------|----------|--------------|
| order items                                                                                                                                                                                           | 1        | 0,14%        |
| Unspecified                                                                                                                                                                                           | 1        | 0,14%        |
| 11 Likert scale                                                                                                                                                                                       | 1        | 0,14%        |
| 1 to 7 scale                                                                                                                                                                                          | 1        | 0,14%        |
| presence questionnaire                                                                                                                                                                                |          |              |
| IPQ version -3 to +3 scale                                                                                                                                                                            | 4        | 0,55%        |
| by Witmer and Singer (1998) - 7 Likert                                                                                                                                                                | 1        | 0,14%        |
| Questionnaire for User Interface and Satisfaction (QUIS)                                                                                                                                              |          |              |
| 7 Likert                                                                                                                                                                                              | 3        | 0,41%        |
| Simulator Sickness Questionnaire (SSQ)                                                                                                                                                                |          |              |
| 5 Likert scale                                                                                                                                                                                        | 2        | 0,27%        |
| illusion evaluation questionnaire by Pusch, Martin, and Coquillart                                                                                                                                    |          |              |
| 1 to 7 scale                                                                                                                                                                                          | 2        | 0,27%        |
| adapted from previous/similar research                                                                                                                                                                |          |              |
| Some Advantages of Video Conferencing Over High-quality Audio Conferencing: Fluency and Awareness of Attentional Focus. By Daly-Jones et al. (10.1006/ijhc.1998.0195) - 1 to 7 scale with polar terms | 1        | 0,14%        |
| ITU-R BT - Methodology for the Subjective Assessment of the Quality of Television Pictures                                                                                                            |          |              |
| 1 to 5 scale                                                                                                                                                                                          | 1        | 0,14%        |
| <b>User Action Logging</b>                                                                                                                                                                            |          |              |
| evaluators count/measure                                                                                                                                                                              |          |              |
| unspecified                                                                                                                                                                                           | 19       | 2,61%        |
| on material recorded                                                                                                                                                                                  | 1        | 0,14%        |
| system logs                                                                                                                                                                                           | 18       | 2,47%        |
| evaluators timing                                                                                                                                                                                     | 15       | 2,06%        |
| tracking logs                                                                                                                                                                                         | 7        | 0,96%        |
| <b>User Measurements</b>                                                                                                                                                                              |          |              |
| eye accommodation                                                                                                                                                                                     | 2        | 0,27%        |
| gait tracking                                                                                                                                                                                         |          |              |
| Force plate balance                                                                                                                                                                                   | 1        | 0,14%        |
| Electromyography (EMG)                                                                                                                                                                                | 1        | 0,14%        |
| grasping / press force                                                                                                                                                                                | 1        | 0,14%        |
| Heart Rate Variability (HRV)                                                                                                                                                                          | 1        | 0,14%        |
| Electroencephalography (EEG)                                                                                                                                                                          | 1        | 0,14%        |
| eye tracking                                                                                                                                                                                          | 1        | 0,14%        |
| <b>Interviews</b>                                                                                                                                                                                     | <b>1</b> | <b>0,14%</b> |
| structured                                                                                                                                                                                            | 1        | 0,14%        |
| <b>Observation</b>                                                                                                                                                                                    | <b>1</b> | <b>0,14%</b> |
| evaluators observations                                                                                                                                                                               | 1        | 0,14%        |

|                                         |           |               |
|-----------------------------------------|-----------|---------------|
| <b>Prototype focus</b>                  | <b>48</b> | <b>6,58%</b>  |
| <b>Interviews</b>                       |           |               |
| unstructured                            | 12        | 1,65%         |
| unstructured post-experiment discussion | 4         | 0,55%         |
| semi-structured                         | 4         | 0,55%         |
| structured                              |           |               |
| open ended question/s                   | 2         | 0,27%         |
| based on SIE's ease of use              | 1         | 0,14%         |
| custom-made                             |           |               |
| -3 to +3 scale                          | 1         | 0,14%         |
| <b>Questionnaire</b>                    |           |               |
| custom-made                             |           |               |
| open ended question/s                   | 5         | 0,69%         |
| 7 Likert scale                          | 3         | 0,41%         |
| order items                             | 2         | 0,27%         |
| open comments                           | 2         | 0,27%         |
| 1 to 10 scale                           | 1         | 0,14%         |
| 5 Likert scale                          | 1         | 0,14%         |
| <b>Observation</b>                      |           |               |
| evaluators observations                 | 6         | 0,82%         |
| <b>Experts Review / Evaluation</b>      | <b>2</b>  | <b>0,27%</b>  |
| Tasks analysis                          | 1         | 0,14%         |
| Experts Interview                       | 1         | 0,14%         |
| <b>Think aloud / Shadowing</b>          | <b>1</b>  | <b>0,14%</b>  |
| Think aloud on prototype                | 1         | 0,14%         |
| <b>Task performance</b>                 | <b>89</b> | <b>12,21%</b> |
| <b>User Action Logging</b>              |           |               |
| system logs                             | 39        | 5,35%         |
| tracking logs                           | 36        | 4,94%         |
| evaluators timing                       | 8         | 1,10%         |
| unspecified                             | 6         | 0,82%         |
| on material recorded                    | 2         | 0,27%         |
| evaluators count/measure                | 5         | 0,69%         |
| on material recorded                    | 3         | 0,41%         |
| unspecified                             | 2         | 0,27%         |
| <b>User Measurements</b>                | <b>1</b>  | <b>0,14%</b>  |
| Electroencephalography (EEG)            | 1         | 0,14%         |

|                                          |           |              |
|------------------------------------------|-----------|--------------|
| <b>UX - Emotion</b>                      | <b>22</b> | <b>3,02%</b> |
| <b>Questionnaire</b>                     |           |              |
| custom-made                              |           |              |
| 7 Likert scale                           | 7         | 0,96%        |
| opposed adjective Likert 5 scale         | 3         | 0,41%        |
| 5 Likert scale                           | 1         | 0,14%        |
| 9 Likert scale                           | 1         | 0,14%        |
| Simulator Sickness Questionnaire (SSQ)   |           |              |
| 5 Likert scale                           | 1         | 0,14%        |
| <b>Observation</b>                       |           |              |
| evaluators coded/structured observations |           |              |
| on material recorded                     | 2         | 0,27%        |
| unspecified                              | 1         | 0,14%        |
| evaluators observations                  |           |              |
| unspecified                              | 2         | 0,27%        |
| <b>Interviews</b>                        |           |              |
| structured                               |           |              |
| based on SIE's ease of use               | 1         | 0,14%        |
| 7 Likert scale                           | 1         | 0,14%        |
| unstructured post-experiment discussion  | 1         | 0,14%        |
| semi-structured                          | 1         | 0,14%        |
| <b>UX - Meaning</b>                      |           |              |
| <b>Questionnaire</b>                     |           |              |
| custom-made                              |           |              |
| 5 Likert scale                           | 1         | 0,14%        |
| opposed adjective Likert 5 scale         | 1         | 0,14%        |
| 7 Likert scale                           | 1         | 0,14%        |
| <b>Interviews</b>                        |           |              |
| unstructured post-experiment discussion  | 1         | 0,14%        |
| <b>UX - Usability</b>                    |           |              |
| <b>Questionnaire</b>                     |           |              |
| custom-made                              |           |              |
| 7 Likert scale                           | 63        | 8,64%        |
| 5 Likert scale                           | 20        | 2,74%        |
| order items                              | 19        | 2,61%        |
| 1 to 5 scale                             | 7         | 0,96%        |
| 1 to 7 scale                             | 6         | 0,82%        |
| closed response multi-item               | 4         | 0,55%        |
| Unspecified                              | 4         | 0,55%        |
| 10 Likert scale                          | 3         | 0,41%        |
| 9 Likert scale                           | 3         | 0,41%        |

|                                                                                                                                                                                                       |    |       |
|-------------------------------------------------------------------------------------------------------------------------------------------------------------------------------------------------------|----|-------|
| -3 to +3 scale                                                                                                                                                                                        | 3  | 0,41% |
| 1 to 10 scale                                                                                                                                                                                         | 2  | 0,27% |
| balanced scale: -2 -1 +1 +2                                                                                                                                                                           | 2  | 0,27% |
| open comments                                                                                                                                                                                         | 1  | 0,14% |
| opposed adjective Likert 5 scale                                                                                                                                                                      | 1  | 0,14% |
| 3 Separate Propositions (Not Acceptable/Acceptable/Excellent)                                                                                                                                         | 1  | 0,14% |
| closed ended question/s                                                                                                                                                                               | 1  | 0,14% |
| 10 Likert scale polar terms                                                                                                                                                                           | 1  | 0,14% |
| 7 Likert polar terms scale                                                                                                                                                                            | 1  | 0,14% |
| adapted from previous/similar research                                                                                                                                                                |    |       |
| Assessing dimensions of perceived visual aesthetics of web sites by Lavie and Tractinsky (2004) - 1 to 5 scale                                                                                        | 4  | 0,55% |
| Some Advantages of Video Conferencing Over High-quality Audio Conferencing: Fluency and Awareness of Attentional Focus. By Daly-Jones et al. (10.1006/ijhc.1998.0195) - 1 to 7 scale with polar terms | 3  | 0,41% |
| ISO 9241                                                                                                                                                                                              | 4  | 0,55% |
| part 9 - 2000(E)                                                                                                                                                                                      |    |       |
| NASA TLX                                                                                                                                                                                              |    |       |
| 100 scale                                                                                                                                                                                             | 1  | 0,14% |
| RTLX version (Raw)- 100 scale                                                                                                                                                                         | 1  | 0,14% |
| 7 Likert                                                                                                                                                                                              | 1  | 0,14% |
| Simulator Sickness Questionnaire (SSQ)                                                                                                                                                                |    |       |
| 5 Likert scale                                                                                                                                                                                        | 1  | 0,14% |
| <b>Interviews</b>                                                                                                                                                                                     |    |       |
| structured                                                                                                                                                                                            | 11 | 1,51% |
| 7 Likert scale                                                                                                                                                                                        | 4  | 0,55% |
| based on SIE's ease of use                                                                                                                                                                            | 3  | 0,41% |
| rank items                                                                                                                                                                                            | 2  | 0,27% |
| unspecified                                                                                                                                                                                           | 2  | 0,27% |
| unstructured                                                                                                                                                                                          | 5  | 0,69% |
| unstructured post-experiment discussion                                                                                                                                                               | 2  | 0,27% |
| semi-structured                                                                                                                                                                                       | 2  | 0,27% |
| <b>User Action Logging</b>                                                                                                                                                                            |    |       |
| system logs                                                                                                                                                                                           | 1  | 0,14% |
| <b>Question-answer-Protocol</b>                                                                                                                                                                       |    |       |
| open response (during evaluation)                                                                                                                                                                     | 1  | 0,14% |

|                            |           |              |
|----------------------------|-----------|--------------|
| <b>UX - Usefulness</b>     | <b>15</b> | <b>2,06%</b> |
| <hr/>                      |           |              |
| <b>Questionnaire</b>       |           |              |
| custom-made                |           |              |
| 7 Likert scale             | 6         | 0,82%        |
| closed response multi-item | 2         | 0,27%        |
| 5 Likert scale             | 2         | 0,27%        |
| 9 Likert scale             | 1         | 0,14%        |
| 1 to 7 scale               | 1         | 0,14%        |
| <b>Interviews</b>          |           |              |
| semi-structured            | 1         | 0,14%        |
| unstructured               | 1         | 0,14%        |
| structured                 |           |              |
| 7 Likert scale             | 1         | 0,14%        |

## Section B - Correlation charts

### Health Care & Medicine

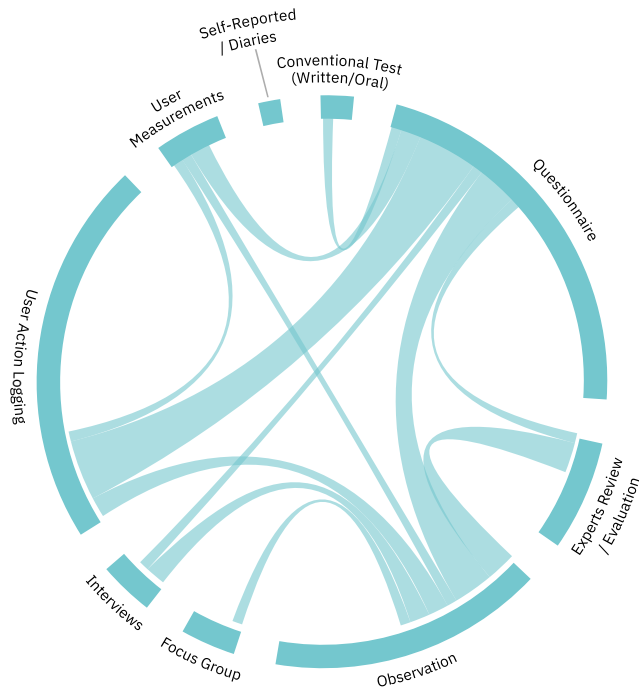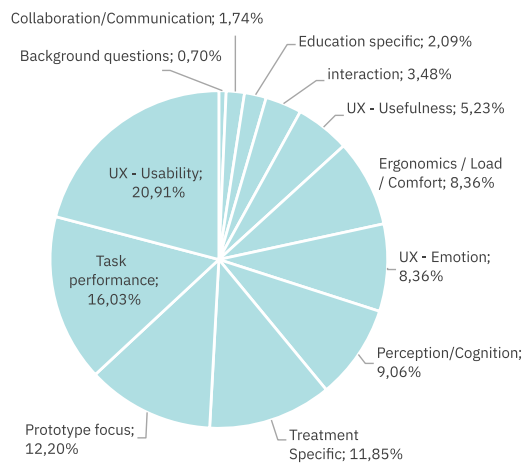

# Section C - Method Used & Aspects Matrix

## Health Care & Medicine

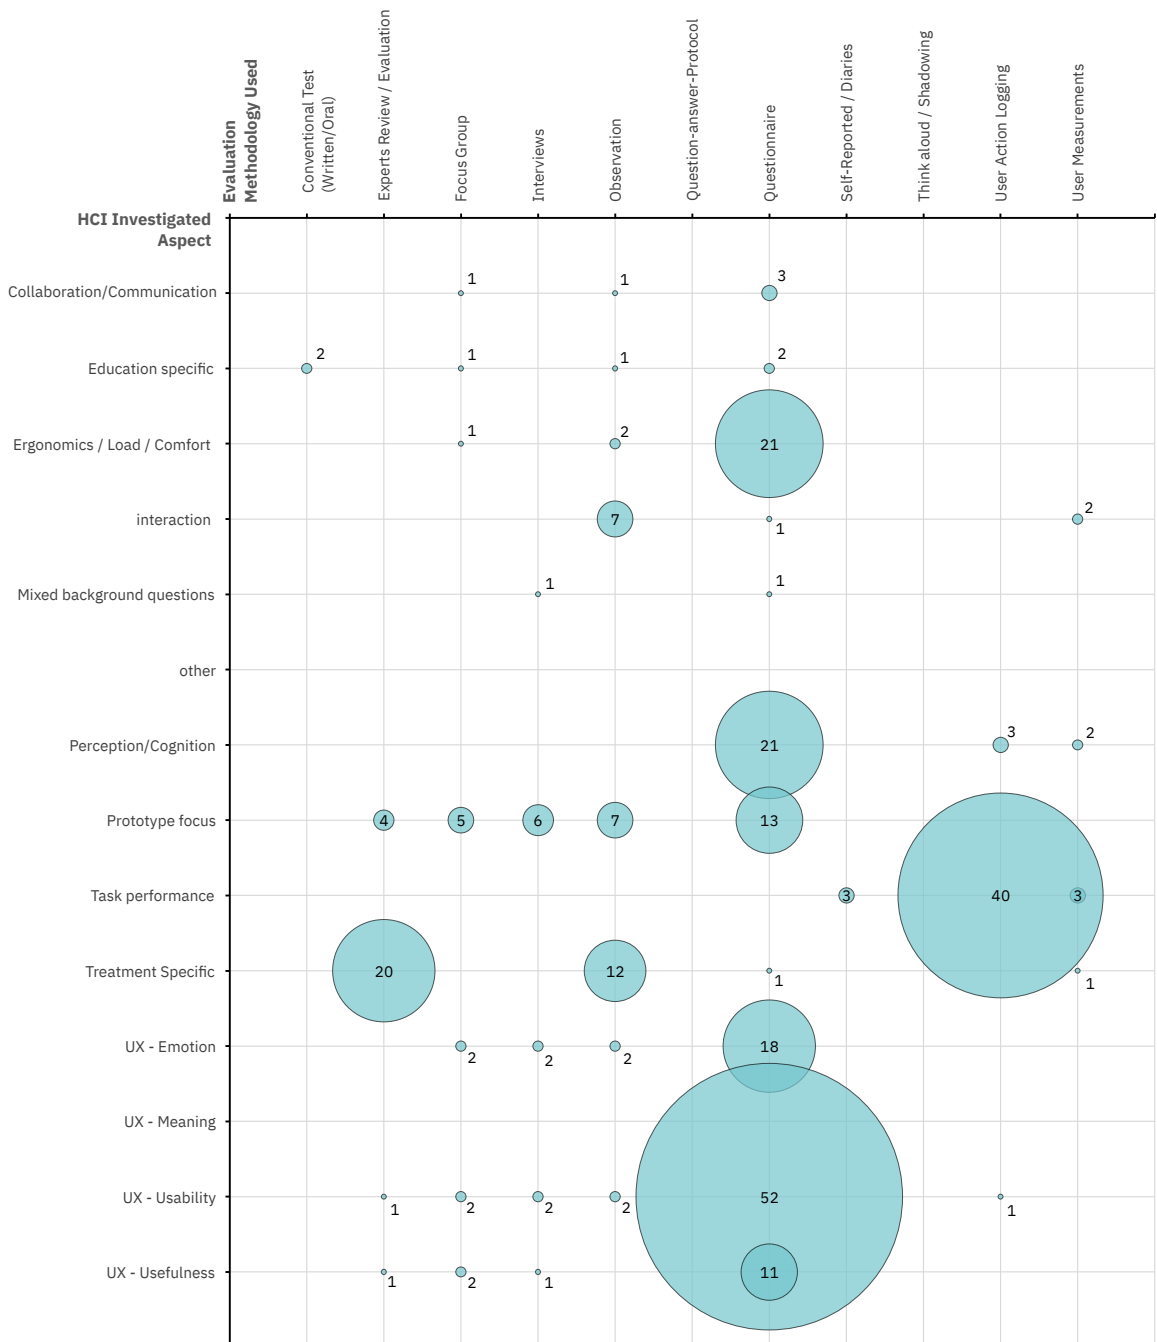

## Section D – Lookup Table: Health Care & Medicine

|                                                               |           |              |
|---------------------------------------------------------------|-----------|--------------|
| <b>Collaboration/Communication</b>                            | <b>5</b>  | <b>1,74%</b> |
| <b>Questionnaire</b>                                          |           |              |
| custom-made                                                   |           |              |
| 6 Likert                                                      | 2         | 0,70%        |
| 5 Likert with proxy users                                     | 1         | 0,35%        |
| <b>Focus Group</b>                                            |           |              |
| Pre focus group                                               | 1         | 0,35%        |
| <b>Observation</b>                                            |           |              |
| evaluators coded/structured observations                      |           |              |
| on material recorded                                          | 1         | 0,35%        |
| <b>Education specific</b>                                     | <b>6</b>  | <b>2,09%</b> |
| <b>Conventional Test (Written/Oral)</b>                       |           |              |
| test with evaluation given by teacher (PRE + POST evaluation) | 2         | 0,70%        |
| <b>Questionnaire</b>                                          |           |              |
| custom-made                                                   |           |              |
| graded questions                                              | 2         | 0,70%        |
| <b>Focus Group</b>                                            |           |              |
| Pre focus group                                               | 1         | 0,35%        |
| <b>Observation</b>                                            |           |              |
| evaluators observations                                       | 1         | 0,35%        |
| <b>Ergonomics / Load / Comfort</b>                            | <b>24</b> | <b>8,36%</b> |
| <b>Questionnaire</b>                                          |           |              |
| NASA TLX                                                      |           |              |
| 7 Likert                                                      | 5         | 1,74%        |
| 100 scale                                                     | 4         | 1,39%        |
| custom-made                                                   |           |              |
| 1 to 10 scale                                                 | 2         | 0,70%        |
| open ended question/s                                         | 1         | 0,35%        |
| 6 Likert                                                      | 1         | 0,35%        |
| Profile of Mood States questionnaire (POMS)                   | 4         | 1,39%        |
| Intrinsic Motivation Inventory (IMI)                          | 2         | 0,70%        |
| 5 Likert scale                                                |           |              |
| Usability Satisfaction Questionnaires                         |           |              |
| 7 Likert                                                      | 1         | 0,35%        |
| System Usability Scale (SUS)                                  |           |              |
| 5 Likert scale                                                | 1         | 0,35%        |

|                                                                                                                                            |           |              |
|--------------------------------------------------------------------------------------------------------------------------------------------|-----------|--------------|
| <b>Observation</b>                                                                                                                         |           |              |
| evaluators observations                                                                                                                    | 2         | 0,70%        |
| <b>Focus Group</b>                                                                                                                         | <b>1</b>  | <b>0,35%</b> |
| Pre focus group                                                                                                                            | 1         | 0,35%        |
| <b>interaction</b>                                                                                                                         | <b>10</b> | <b>3,48%</b> |
| <b>Observation</b>                                                                                                                         | <b>7</b>  | <b>2,44%</b> |
| evaluators observations                                                                                                                    |           |              |
| on material recorded                                                                                                                       | 2         | 0,70%        |
| evaluators coded/structured observations                                                                                                   |           |              |
| on material recorded                                                                                                                       | 3         | 1,05%        |
| <b>User Measurements</b>                                                                                                                   |           |              |
| eye tracking                                                                                                                               | 2         | 0,70%        |
| <b>Questionnaire</b>                                                                                                                       |           |              |
| custom-made                                                                                                                                |           |              |
| 5 Likert scale                                                                                                                             | 1         | 0,35%        |
| <b>Mixed background questions</b>                                                                                                          | <b>2</b>  | <b>0,70%</b> |
| <b>Interviews</b>                                                                                                                          |           |              |
| with proxy users                                                                                                                           |           |              |
| semi-structured                                                                                                                            | 1         | 0,35%        |
| <b>Questionnaire</b>                                                                                                                       |           |              |
| custom-made                                                                                                                                |           |              |
| closed ended question/s                                                                                                                    | 1         | 0,35%        |
| <b>Perception/Cognition</b>                                                                                                                | <b>26</b> | <b>9,06%</b> |
| <b>Questionnaire</b>                                                                                                                       |           |              |
| custom-made                                                                                                                                |           |              |
| 5 Likert scale                                                                                                                             | 10        | 3,48%        |
| 6 Likert                                                                                                                                   | 2         | 0,70%        |
| 1 to 100 scale                                                                                                                             | 1         | 0,35%        |
| presence questionnaire                                                                                                                     |           |              |
| by Slater et al. (1994) - 1 to 7 scale                                                                                                     | 6         | 2,09%        |
| Treatment / Rehabilitation specific Questionnaire                                                                                          |           |              |
| base on VRUSE—a computerized diagnostic tool: for usability evaluation of virtual/synthetic environment systems by S. Roy - 5 Likert scale | 2         | 0,70%        |
| <b>User Action Logging</b>                                                                                                                 |           |              |
| tracking logs                                                                                                                              | 2         | 0,70%        |
| system logs                                                                                                                                | 1         | 0,35%        |
| <b>User Measurements</b>                                                                                                                   | <b>2</b>  | <b>0,70%</b> |
| grasping / press force                                                                                                                     | 1         | 0,35%        |
| eye tracking                                                                                                                               | 1         | 0,35%        |

|                                          |           |               |
|------------------------------------------|-----------|---------------|
| <b>Prototype focus</b>                   | <b>35</b> | <b>12,20%</b> |
| <b>Questionnaire</b>                     |           |               |
| custom-made                              |           |               |
| open ended question/s                    | 5         | 1,74%         |
| 1 to 10 scale                            | 3         | 1,05%         |
| 5 Likert with proxy users                | 2         | 0,70%         |
| 5 Likert scale                           | 1         | 0,35%         |
| 6 Likert                                 | 1         | 0,35%         |
| AttrakDiff                               |           |               |
| Second Version                           | 1         | 0,35%         |
| <b>Observation</b>                       |           |               |
| evaluators observations                  | 6         | 2,09%         |
| evaluators coded/structured observations |           |               |
| on material recorded                     | 1         | 0,35%         |
| <b>Interviews</b>                        |           |               |
| semi-structured                          | 3         | 1,05%         |
| unstructured post-experiment discussion  | 2         | 0,70%         |
| with proxy users                         |           |               |
| semi-structured                          | 1         | 0,35%         |
| <b>Focus Group</b>                       |           |               |
| Post-test focus group                    | 3         | 1,05%         |
| workshop with students                   | 1         | 0,35%         |
| Pre focus group                          | 1         | 0,35%         |
| <b>Experts Review / Evaluation</b>       |           |               |
| Experts Interview                        | 3         | 1,05%         |
| Cognitive Walkthrough                    | 1         | 0,35%         |
| <b>Task performance</b>                  | <b>46</b> | <b>16,03%</b> |
| <b>User Action Logging</b>               |           |               |
| tracking logs                            | 34        | 11,85%        |
| system logs                              | 6         | 2,09%         |
| <b>Self-Reported / Diaries</b>           | <b>3</b>  | <b>1,05%</b>  |
| Self-reported data / Diaries             | 3         | 1,05%         |
| <b>User Measurements</b>                 | <b>3</b>  | <b>1,05%</b>  |
| Electromyography (EMG)                   | 2         | 0,70%         |
| eye tracking                             | 1         | 0,35%         |

|                                                                                                                                            |           |               |
|--------------------------------------------------------------------------------------------------------------------------------------------|-----------|---------------|
| <b>Treatment Specific</b>                                                                                                                  | <b>34</b> | <b>11,85%</b> |
| <b>Experts Review / Evaluation</b>                                                                                                         |           |               |
| Treatment / Rehabilitation specific tests Experts Evaluation                                                                               |           |               |
| Anxiety Disorders Interview Schedule (ADIS-IV)                                                                                             | 4         | 1,39%         |
| Subjective units of discomfort scale (SUDS) (1 to 10 scale) (pre and post therapy)                                                         | 4         | 1,39%         |
| modified The Fear of Spiders Questionnaire (8 Likert) (pre and post therapy)                                                               | 2         | 0,70%         |
| Presence and reality judgment (open ended) (pre and post therapy)                                                                          | 2         | 0,70%         |
| Spider Phobia Beliefs Questionnaire (SPBQ) (1 to 100 scale) (pre and post therapy)                                                         | 2         | 0,70%         |
| Target Behaviors (adapted from Marks & Mathew 1979) (1 to 10 scale) (pre and post therapy)                                                 | 2         | 0,70%         |
| Measures regarding expectations and-satisfaction with the treatment (1 to 7 scale) (pre and post therapy)                                  | 1         | 0,35%         |
| Degree of belief in catastrophic thoughts (1 to 100 scale) (pre and post therapy)                                                          | 1         | 0,35%         |
| unspecified                                                                                                                                | 1         | 0,35%         |
| Fear and avoidance scales (1 to 10 scale) (pre and post therapy)                                                                           | 1         | 0,35%         |
| <b>Observation</b>                                                                                                                         |           |               |
| Treatment / Rehabilitation specific tests Experts Evaluation                                                                               |           |               |
| Behavior Avoidance Test (Bat) (pre and post therapy)                                                                                       | 4         | 1,39%         |
| Standard functional tests (box & blocks, Rancho)                                                                                           | 1         | 0,35%         |
| Wolf Motor Arm Test (pre/post-test)                                                                                                        | 1         | 0,35%         |
| Berg Balance Scale (BBS)                                                                                                                   | 1         | 0,35%         |
| The Fugl-Meyer Upper Extremity Motor Performance Section Test (pre/post-test)                                                              | 1         | 0,35%         |
| clinical measurements on motor rehabilitation                                                                                              | 1         | 0,35%         |
| Working Alliance Inventory (WAI)                                                                                                           | 1         | 0,35%         |
| Objective Structured Assessment Technical Skills (OSATS) (1 to 5 scale)                                                                    | 1         | 0,35%         |
| short Falls Efficacy Scale-International (FES-I)                                                                                           | 1         | 0,35%         |
| <b>User Measurements</b>                                                                                                                   |           |               |
| gait tracking                                                                                                                              |           |               |
| GAITRite system                                                                                                                            | 1         | 0,35%         |
| <b>Questionnaire</b>                                                                                                                       |           |               |
| Treatment / Rehabilitation specific Questionnaire                                                                                          |           |               |
| DASH questionnaire (pre/post-test)                                                                                                         | 1         | 0,35%         |
| <b>UX - Emotion</b>                                                                                                                        | <b>24</b> | <b>8,36%</b>  |
| <b>Questionnaire</b>                                                                                                                       |           |               |
| custom-made                                                                                                                                |           |               |
| 6 Likert                                                                                                                                   | 6         | 2,09%         |
| 5 Likert with proxy users                                                                                                                  | 3         | 1,05%         |
| 1 to 10 scale                                                                                                                              | 1         | 0,35%         |
| 5 Likert scale                                                                                                                             | 1         | 0,35%         |
| Treatment / Rehabilitation specific Questionnaire                                                                                          |           |               |
| base on VRUSE—a computerized diagnostic tool: for usability evaluation of virtual/synthetic environment systems by S. Roy - 5 Likert scale | 4         | 1,39%         |

|                                                                                                                                            |           |               |
|--------------------------------------------------------------------------------------------------------------------------------------------|-----------|---------------|
| AttrakDiff                                                                                                                                 |           |               |
| Second Version                                                                                                                             | 2         | 0,70%         |
| Intrinsic Motivation Inventory (IMI)                                                                                                       |           |               |
| 5 Likert scale                                                                                                                             | 1         | 0,35%         |
| <b>Interviews</b>                                                                                                                          |           |               |
| unstructured post-experiment discussion                                                                                                    | 1         | 0,35%         |
| structured                                                                                                                                 |           |               |
| 7 Likert scale                                                                                                                             | 1         | 0,35%         |
| <b>Focus Group</b>                                                                                                                         |           |               |
| Post test focus group                                                                                                                      | 2         | 0,70%         |
| <b>Observation</b>                                                                                                                         |           |               |
| evaluators observations                                                                                                                    | 1         | 0,35%         |
| evaluators coded/structured observations                                                                                                   |           |               |
| on material recorded                                                                                                                       | 1         | 0,35%         |
| <b>UX - Usability</b>                                                                                                                      | <b>60</b> | <b>20,91%</b> |
| <b>Questionnaire</b>                                                                                                                       |           |               |
| custom-made                                                                                                                                |           |               |
| 5 Likert scale                                                                                                                             | 12        | 4,18%         |
| 6 Likert                                                                                                                                   | 9         | 3,14%         |
| 1 to 5 scale                                                                                                                               | 6         | 2,09%         |
| open ended question/s                                                                                                                      | 3         | 1,05%         |
| 1 to 10 scale                                                                                                                              | 2         | 0,70%         |
| Usability Satisfaction Questionnaires                                                                                                      |           |               |
| 7 Likert                                                                                                                                   | 6         | 2,09%         |
| Treatment / Rehabilitation specific Questionnaire                                                                                          |           |               |
| base on VRUSE—a computerized diagnostic tool: for usability evaluation of virtual/synthetic environment systems by S. Roy - 5 Likert scale | 6         | 2,09%         |
| System Usability Scale (SUS)                                                                                                               |           |               |
| 5 Likert scale                                                                                                                             | 4         | 1,39%         |
| NASA TLX                                                                                                                                   |           |               |
| 7 Likert                                                                                                                                   | 1         | 0,35%         |
| 100 scale                                                                                                                                  | 1         | 0,35%         |
| Intrinsic Motivation Inventory (IMI)                                                                                                       |           |               |
| 5 Likert scale                                                                                                                             | 1         | 0,35%         |
| AttrakDiff                                                                                                                                 |           |               |
| Second Version                                                                                                                             | 1         | 0,35%         |

|                                    |           |              |
|------------------------------------|-----------|--------------|
| <b>Interviews</b>                  |           |              |
| with proxy users                   |           |              |
| semi-structured                    | 1         | 0,35%        |
| structured                         |           |              |
| 7 Likert scale                     | 1         | 0,35%        |
| <b>Focus Group</b>                 |           |              |
| Pre focus group                    | 1         | 0,35%        |
| Post test focus group              | 1         | 0,35%        |
| <b>Observation</b>                 |           |              |
| evaluators observations            | 2         | 0,70%        |
| <b>Experts Review / Evaluation</b> |           |              |
| Experts Interview                  | 1         | 0,35%        |
| <b>User Action Logging</b>         |           |              |
| system logs                        | 1         | 0,35%        |
| <b>UX - Usefulness</b>             | <b>15</b> | <b>5,23%</b> |
| <hr/>                              |           |              |
| <b>Questionnaire</b>               |           |              |
| custom-made                        |           |              |
| 5 Likert scale                     | 6         | 2,09%        |
| 6 Likert                           | 2         | 0,70%        |
| 5 Likert with proxy users          | 1         | 0,35%        |
| System Usability Scale (SUS)       |           |              |
| 5 Likert scale                     | 2         | 0,70%        |
| <b>Focus Group</b>                 |           |              |
| Pre focus group                    | 1         | 0,35%        |
| Post test focus group              | 1         | 0,35%        |
| <b>Experts Review / Evaluation</b> |           |              |
| Experts Interview                  | 1         | 0,35%        |
| <b>Interviews</b>                  |           |              |
| with proxy users                   |           |              |
| semi-structured                    | 1         | 0,35%        |

## Section B - Correlation charts Industry

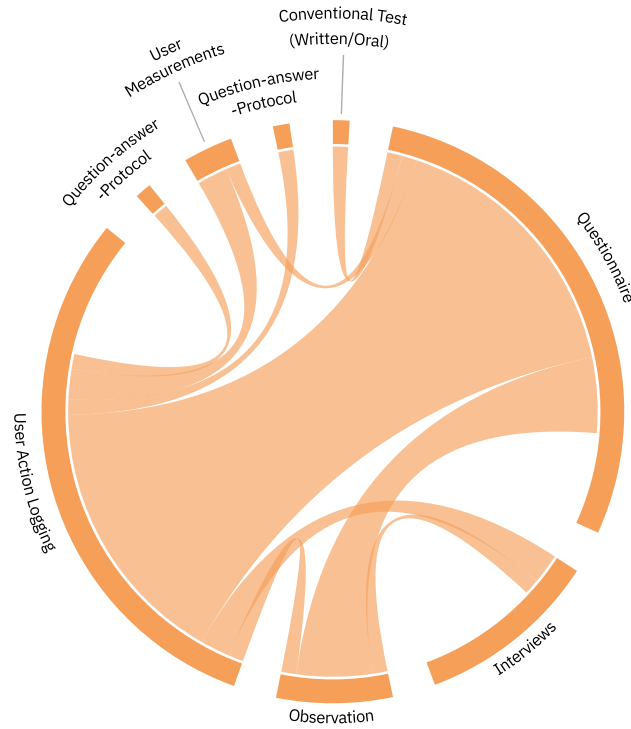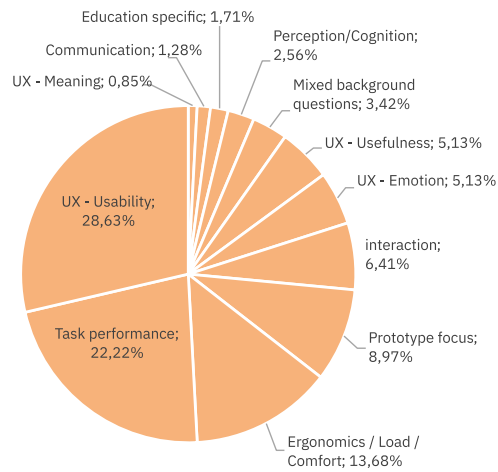

# Section C - Method Used & Aspects Matrix

## Industry

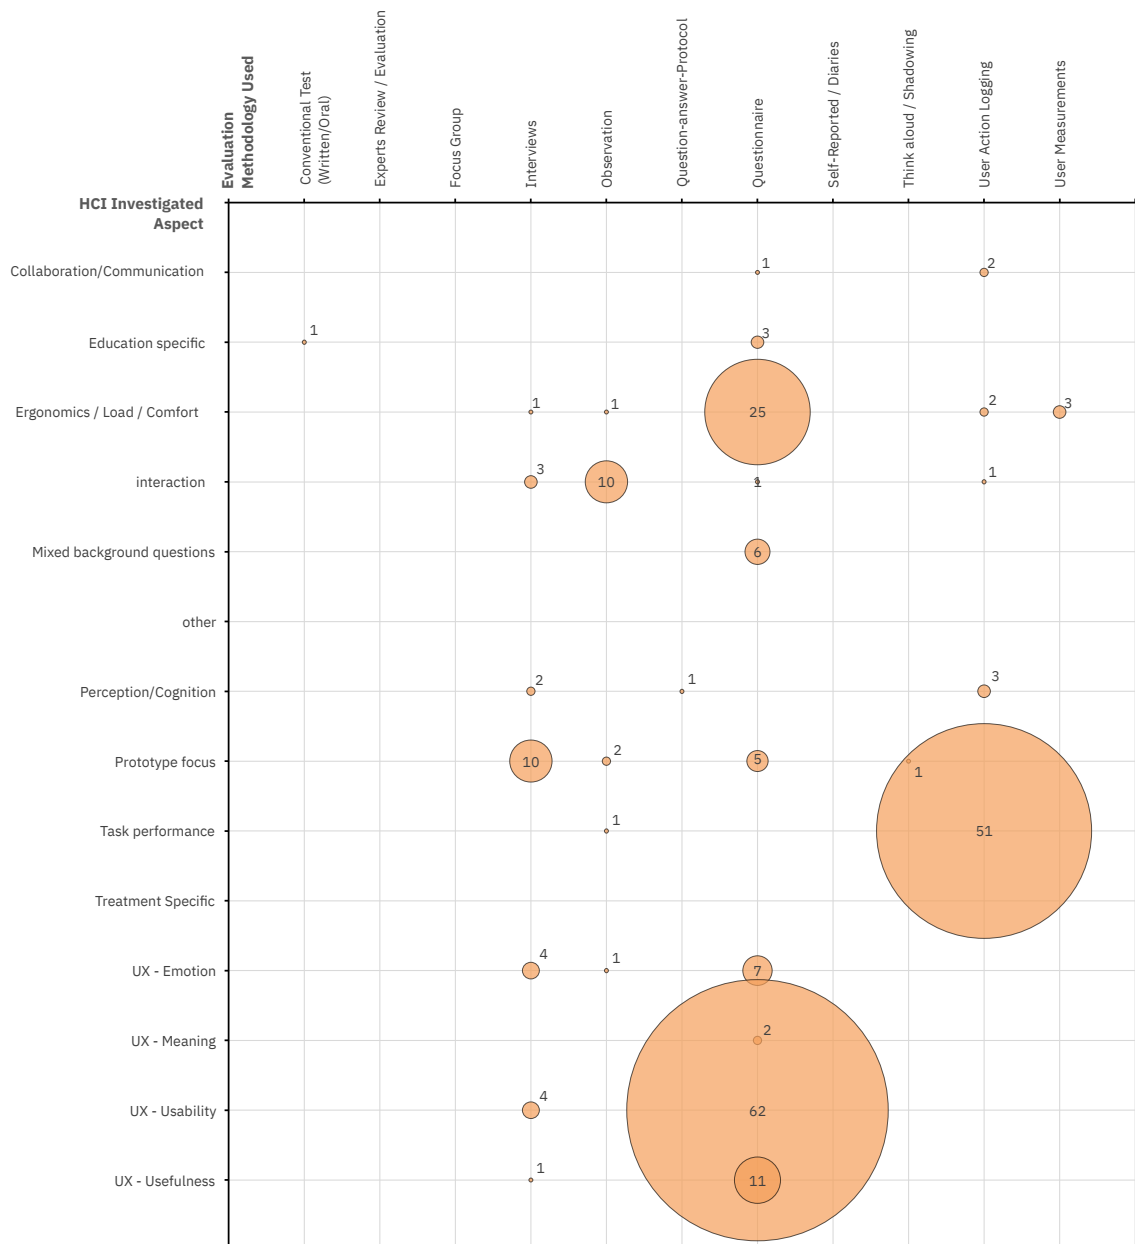

## Section D – Lookup Table: Industry

|                                                                    |           |               |
|--------------------------------------------------------------------|-----------|---------------|
| <b>Collaboration/Communication</b>                                 | <b>3</b>  | <b>1,28%</b>  |
| <b>User Action Logging</b>                                         |           |               |
| evaluators count/measure                                           | 2         | 0,85%         |
| <b>Questionnaire</b>                                               |           |               |
| custom-made                                                        |           |               |
| 1 to 7 scale                                                       | 1         | 0,43%         |
| <b>Education specific</b>                                          | <b>4</b>  | <b>1,71%</b>  |
| <b>Questionnaire</b>                                               |           |               |
| custom-made                                                        |           |               |
| graded questions                                                   | 2         | 0,85%         |
| 5 Likert scale                                                     | 1         | 0,43%         |
| <b>Conventional Test (Written/Oral)</b>                            |           |               |
| test with evaluation give by teacher (Control + Experiment groups) | 1         | 0,43%         |
| <b>Ergonomics / Load / Comfort</b>                                 | <b>32</b> | <b>13,68%</b> |
| <b>Questionnaire</b>                                               |           |               |
| custom-made                                                        |           |               |
| 7 Likert scale                                                     | 6         | 2,56%         |
| order items                                                        | 1         | 0,43%         |
| 9 Likert scale                                                     | 1         | 0,43%         |
| 10 Likert scale polar terms                                        | 1         | 0,43%         |
| 1 to 5 scale                                                       | 1         | 0,43%         |
| 5 Likert scale                                                     | 1         | 0,43%         |
| NASA TLX                                                           |           |               |
| 100 scale                                                          | 7         | 2,99%         |
| Cornell Musculoskeletal Discomfort Questionnaires (CMDQ)           | 3         | 1,28%         |
| Sensitivity scale questionnaire by Detlev von Zerssen              | 2         | 0,85%         |
| EZ-Scale                                                           | 2         | 0,85%         |
| <b>User Measurements</b>                                           |           |               |
| Heart Rate Variability (HRV)                                       | 3         | 1,28%         |
| <b>User Action Logging</b>                                         |           |               |
| tracking logs                                                      | 2         | 0,85%         |
| <b>Interviews</b>                                                  |           |               |
| structured                                                         |           |               |
| 8 Likert scale                                                     | 1         | 0,43%         |
| <b>Observation</b>                                                 |           |               |
| evaluators observations                                            | 1         | 0,43%         |

|                                                                                                 |           |              |
|-------------------------------------------------------------------------------------------------|-----------|--------------|
| <b>interaction</b>                                                                              | <b>15</b> | <b>6,41%</b> |
| <hr/>                                                                                           |           |              |
| <b>Observation</b>                                                                              |           |              |
| evaluators observations                                                                         |           |              |
| unspecified                                                                                     | 8         | 3,42%        |
| on material recorded                                                                            | 2         | 0,85%        |
| <b>Interviews</b>                                                                               |           |              |
| semi-structured                                                                                 | 1         | 0,43%        |
| unstructured                                                                                    | 1         | 0,43%        |
| structured                                                                                      |           |              |
| 6 Likert scale                                                                                  | 1         | 0,43%        |
| <b>User Action Logging</b>                                                                      |           |              |
| tracking logs                                                                                   | 1         | 0,43%        |
| <b>Questionnaire</b>                                                                            |           |              |
| custom-made                                                                                     |           |              |
| 9 Likert scale                                                                                  | 1         | 0,43%        |
| <b>Mixed background questions</b>                                                               | <b>6</b>  | <b>3,42%</b> |
| <hr/>                                                                                           |           |              |
| <b>Questionnaire</b>                                                                            |           |              |
| custom-made                                                                                     |           |              |
| 5 Likert scale                                                                                  | 2         | 0,85%        |
| 1 to 7 scale                                                                                    | 2         | 0,85%        |
| closed ended question/s                                                                         | 1         | 0,43%        |
| 1 to 5 scale                                                                                    | 1         | 0,43%        |
| Post Experiment Questionnaire for UX for MARs by Olsson et al.<br>(10.1007/978-1-4614-4205-9_9) |           |              |
|                                                                                                 | 2         | 0,85%        |
| <b>Perception/Cognition</b>                                                                     |           |              |
| <hr/>                                                                                           |           |              |
| <b>User Action Logging</b>                                                                      |           |              |
| evaluators count/measure                                                                        | 1         | 0,43%        |
| tracking logs                                                                                   | 1         | 0,43%        |
| evaluators timing                                                                               | 1         | 0,43%        |
| <b>Interviews</b>                                                                               |           |              |
| structured                                                                                      |           |              |
| 9 Likert scale                                                                                  | 1         | 0,43%        |
| 7 Likert scale                                                                                  | 1         | 0,43%        |
| <b>Question-answer-Protocol</b>                                                                 |           |              |
| closed response (during evaluation)                                                             | 1         | 0,43%        |
| <b>Prototype focus</b>                                                                          |           |              |
| <hr/>                                                                                           |           |              |
| <b>Interviews</b>                                                                               |           |              |
| semi-structured                                                                                 |           |              |
| open ended question/s                                                                           | 2         | 0,85%        |
| unstructured post-experiment discussion                                                         | 3         | 1,28%        |

|                                                                                                 |           |               |
|-------------------------------------------------------------------------------------------------|-----------|---------------|
| unstructured                                                                                    | 2         | 0,85%         |
| structured                                                                                      |           |               |
| 6 Likert scale                                                                                  | 1         | 0,43%         |
| <b>Questionnaire</b>                                                                            |           |               |
| custom-made                                                                                     |           |               |
| open ended question/s                                                                           | 4         | 1,71%         |
| open comments                                                                                   | 1         | 0,43%         |
| Post Experiment Questionnaire for UX for MARs by Olsson et al.<br>(10.1007/978-1-4614-4205-9_9) | 3         | 1,28%         |
| <b>Observation</b>                                                                              |           |               |
| comments collection during test                                                                 | 2         | 0,85%         |
| <b>Think aloud / Shadowing</b>                                                                  |           |               |
| Think aloud on task                                                                             | 1         | 0,43%         |
| <b>Task performance</b>                                                                         | <b>52</b> | <b>22,22%</b> |
| <b>User Action Logging</b>                                                                      | <b>51</b> | <b>21,79%</b> |
| tracking logs                                                                                   | 16        | 6,84%         |
| evaluators count/measure                                                                        |           |               |
| unspecified                                                                                     | 11        | 4,70%         |
| on material recorded                                                                            | 2         | 0,85%         |
| evaluators timing                                                                               |           |               |
| unspecified                                                                                     | 10        | 4,27%         |
| on material recorded                                                                            | 2         | 0,85%         |
| system logs                                                                                     | 10        | 4,27%         |
| <b>Observation</b>                                                                              |           |               |
| evaluators observations                                                                         |           |               |
| on material recorded                                                                            | 1         | 0,43%         |
| <b>UX - Emotion</b>                                                                             | <b>12</b> | <b>5,13%</b>  |
| <b>Questionnaire</b>                                                                            |           |               |
| custom-made                                                                                     |           |               |
| 10 Likert scale polar terms                                                                     | 3         | 1,28%         |
| open ended question/s                                                                           | 1         | 0,43%         |
| 7 Likert scale                                                                                  | 1         | 0,43%         |
| 1 to 5 scale                                                                                    | 1         | 0,43%         |
| 5 Likert scale                                                                                  | 1         | 0,43%         |
| <b>Interviews</b>                                                                               |           |               |
| unstructured post-experiment discussion                                                         | 4         | 1,71%         |
| <b>Observation</b>                                                                              | <b>1</b>  | <b>0,43%</b>  |
| evaluators observations                                                                         | 1         | 0,43%         |

|                                                                                                 |           |               |
|-------------------------------------------------------------------------------------------------|-----------|---------------|
| <b>UX - Meaning</b>                                                                             | <b>2</b>  | <b>0,85%</b>  |
| <hr/>                                                                                           |           |               |
| <b>Questionnaire</b>                                                                            |           |               |
| custom-made                                                                                     |           |               |
| 5 Likert scale                                                                                  | 2         | 0,85%         |
| <b>UX - Usability</b>                                                                           | <b>66</b> | <b>28,63%</b> |
| <hr/>                                                                                           |           |               |
| <b>Questionnaire</b>                                                                            |           |               |
| custom-made                                                                                     |           |               |
| 5 Likert scale                                                                                  | 27        | 11,54%        |
| 7 Likert scale                                                                                  | 7         | 2,99%         |
| 9 Likert scale                                                                                  | 6         | 2,56%         |
| order items                                                                                     | 4         | 1,71%         |
| open ended question/s                                                                           | 3         | 1,28%         |
| 10 Likert scale polar terms                                                                     | 2         | 0,85%         |
| 1 to 5 scale                                                                                    | 2         | 0,85%         |
| 1 to 7 scale                                                                                    | 1         | 0,43%         |
| 6 Likert scale                                                                                  | 1         | 0,43%         |
| Perceived Usefulness Perceive Ease of Use (PUEU)                                                | 5         | 2,14%         |
| Post-Study System Usability Questionnaire (PSSUQ)                                               |           |               |
| 7 Likert scale                                                                                  | 2         | 0,85%         |
| Post Experiment Questionnaire for UX for MARs by Olsson et al.<br>(10.1007/978-1-4614-4205-9_9) | 1         | 0,43%         |
| After-Scenario Questionnaire (ASQ)                                                              |           |               |
| 7 Likert scale                                                                                  | 1         | 0,43%         |
| NASA TLX                                                                                        |           |               |
| 100 scale                                                                                       | 1         | 0,43%         |
| <b>Interviews</b>                                                                               |           |               |
| structured                                                                                      |           |               |
| 5 Likert scale                                                                                  | 1         | 0,43%         |
| 10 Likert scale                                                                                 | 1         | 0,43%         |
| unstructured post-experiment discussion                                                         | 1         | 0,43%         |
| semi-structured                                                                                 | 1         | 0,43%         |
| <b>UX - Usefulness</b>                                                                          | <b>12</b> | <b>5,13%</b>  |
| <hr/>                                                                                           |           |               |
| <b>Questionnaire</b>                                                                            |           |               |
| custom-made                                                                                     |           |               |
| 5 Likert scale                                                                                  | 4         | 1,71%         |
| 7 Likert scale                                                                                  | 2         | 0,85%         |
| 1 to 5 scale                                                                                    | 2         | 0,85%         |
| 1 to 7 scale                                                                                    | 2         | 0,85%         |
| Perceived Usefulness Perceive Ease of Use (PUEU)                                                | 1         | 0,43%         |
| <b>Interviews</b>                                                                               | <b>1</b>  | <b>0,43%</b>  |
| semi-structured                                                                                 | 1         | 0,43%         |
| -                                                                                               | 1         | 0,43%         |

## Section B - Correlation charts

### Navigation & Driving

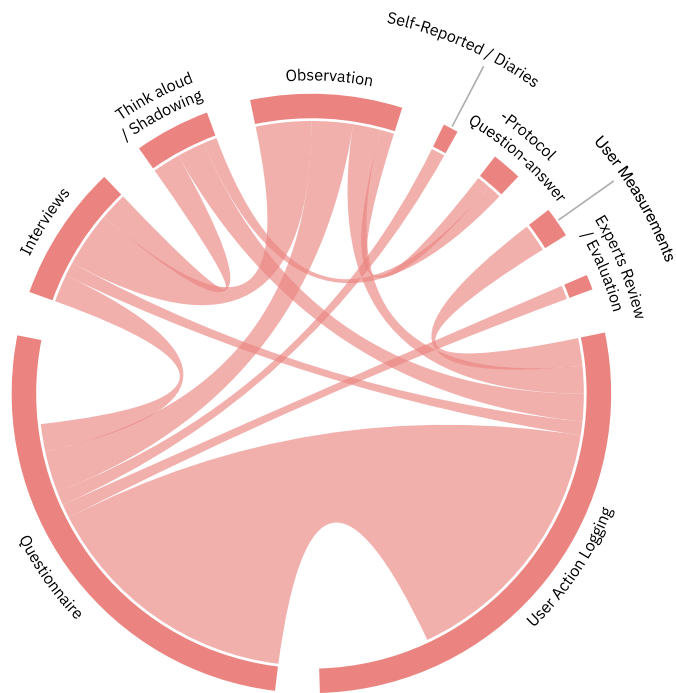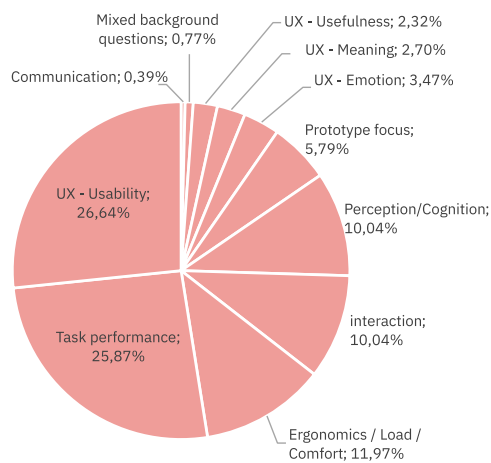

# Section C - Method Used & Aspects Matrix

## Navigation & Driving

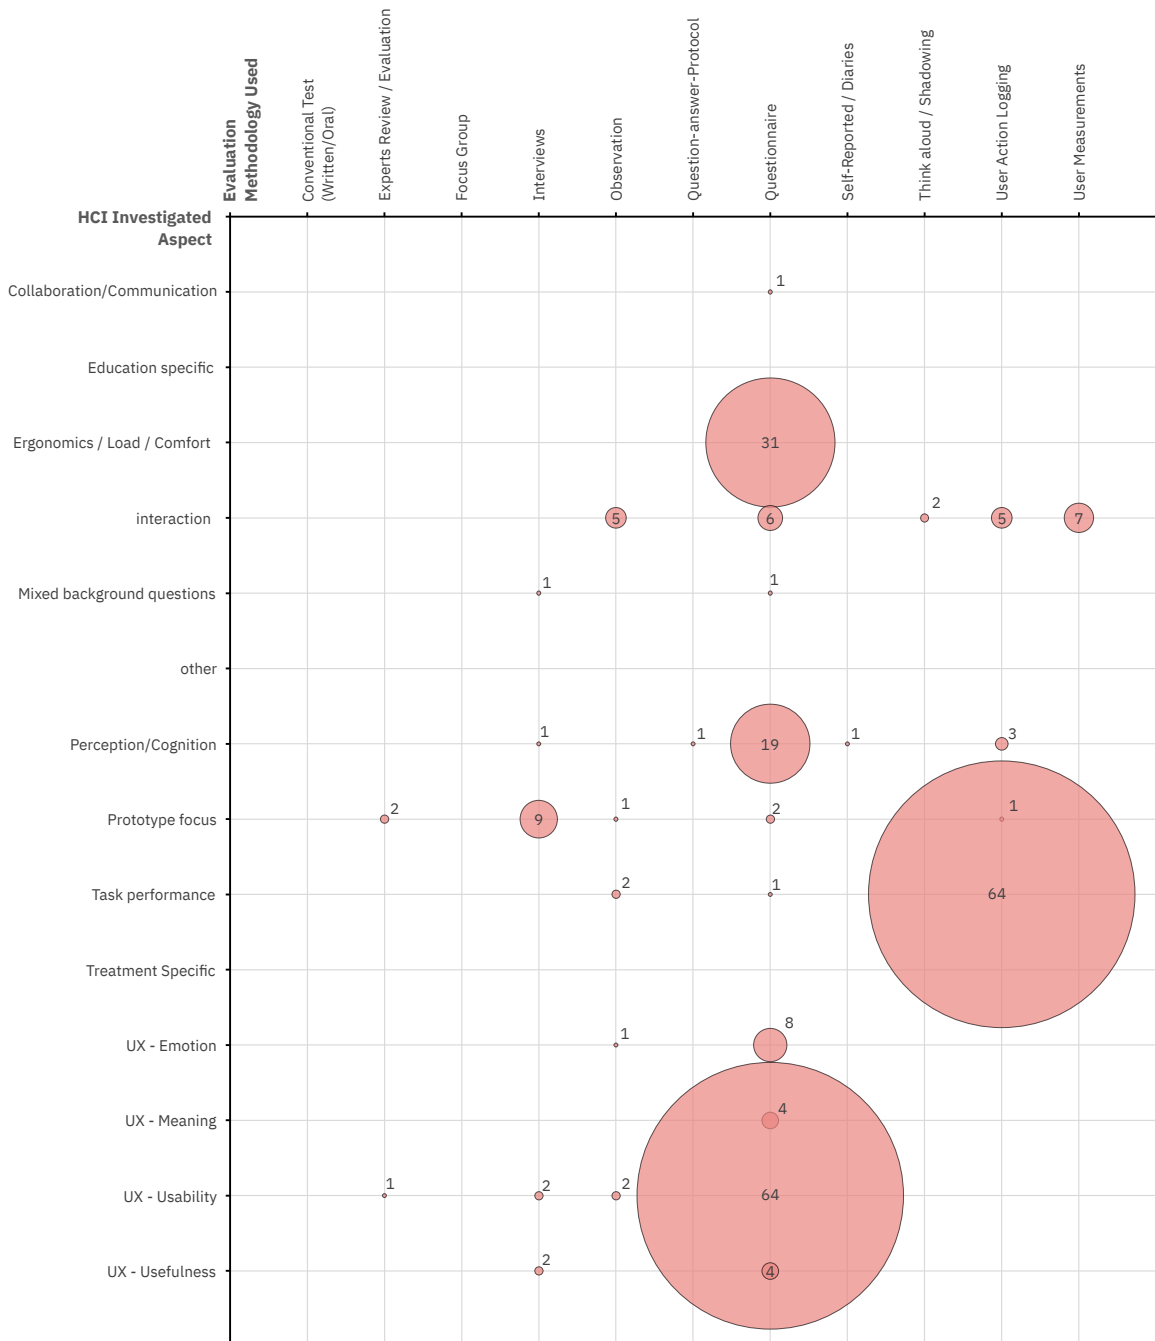

## Section D – Lookup Table: Navigation & Driving

|                                                                                                 |           |               |
|-------------------------------------------------------------------------------------------------|-----------|---------------|
| <b>Collaboration/Communication</b>                                                              | <b>1</b>  | <b>0,39%</b>  |
| <b>Questionnaire</b>                                                                            |           |               |
| Unified Theory of Acceptance and Use of Technology (UTAUT2)                                     |           |               |
| 7 Likert scale                                                                                  | 1         | 0,39%         |
| <b>Ergonomics / Load / Comfort</b>                                                              | <b>31</b> | <b>11,97%</b> |
| <b>Questionnaire</b>                                                                            |           |               |
| NASA TLX                                                                                        |           |               |
| 100 scale                                                                                       | 11        | 4,25%         |
| unweighted                                                                                      | 3         | 1,16%         |
| custom-made                                                                                     |           |               |
| 5 Likert scale                                                                                  | 5         | 1,93%         |
| 1 to 5 scale                                                                                    | 1         | 0,39%         |
| 1 to 6 scale                                                                                    | 1         | 0,39%         |
| ISO 9241                                                                                        |           |               |
| part 9 - with only one Fatigue category (7 Likert)                                              | 5         | 1,93%         |
| Unified Theory of Acceptance and Use of Technology (UTAUT2)                                     |           |               |
| 7 Likert scale                                                                                  | 2         | 0,77%         |
| System Usability Scale (SUS)                                                                    |           |               |
| 7 Likert scale                                                                                  | 1         | 0,39%         |
| Short Feedback Questionnaire (SFQ)                                                              |           |               |
| 5 Likert scale                                                                                  | 1         | 0,39%         |
| Rating Scale for Mental Effort (RSME)                                                           |           |               |
| -                                                                                               | 1         | 0,39%         |
| <b>interaction</b>                                                                              | <b>25</b> | <b>10,04%</b> |
| <b>Questionnaire</b>                                                                            |           |               |
| custom-made                                                                                     |           |               |
| -3 to +3 scale                                                                                  | 4         | 1,54%         |
| Unified Theory of Acceptance and Use of Technology (UTAUT2)                                     |           |               |
| 7 Likert scale                                                                                  | 2         | 0,77%         |
| Post Experiment Questionnaire for UX for MARs by Olsson et al.<br>(10.1007/978-1-4614-4205-9_9) | 1         | 0,39%         |
| <b>User Measurements</b>                                                                        | <b>7</b>  | <b>2,70%</b>  |
| eye tracking                                                                                    | 7         | 2,70%         |
| <b>Observation</b>                                                                              |           |               |
| evaluators observations                                                                         | 4         | 1,54%         |

|                                                                                                 |           |               |
|-------------------------------------------------------------------------------------------------|-----------|---------------|
| evaluators coded/structured observations                                                        |           |               |
| on material recorded                                                                            | 1         | 0,39%         |
| <b>User Action Logging</b>                                                                      |           |               |
| tracking logs                                                                                   | 5         | 1,93%         |
| <b>Think aloud / Shadowing</b>                                                                  |           |               |
| Think aloud on prototype                                                                        | 1         | 0,39%         |
| Shadowing                                                                                       | 1         | 0,39%         |
| <b>Mixed background questions</b>                                                               | <b>2</b>  | <b>0,77%</b>  |
| <b>Interviews</b>                                                                               | <b>1</b>  | <b>0,39%</b>  |
| semi-structured                                                                                 | 1         | 0,39%         |
| <b>Questionnaire</b>                                                                            |           |               |
| Technical self-efficacy (TSE) Questionnaire                                                     | 1         | 0,39%         |
| <b>Perception/Cognition</b>                                                                     | <b>25</b> | <b>10,04%</b> |
| <b>Questionnaire</b>                                                                            |           |               |
| custom-made                                                                                     |           |               |
| 5 Likert scale                                                                                  | 5         | 1,93%         |
| closed ended question/s                                                                         | 3         | 1,16%         |
| 7 Likert scale                                                                                  | 2         | 0,77%         |
| -3 to +3 scale                                                                                  | 2         | 0,77%         |
| 6 Likert                                                                                        | 1         | 0,39%         |
| presence questionnaire                                                                          |           |               |
| by Witmer and Singer (1998) - 7 Likert                                                          | 6         | 2,32%         |
| Post Experiment Questionnaire for UX for MARs by Olsson et al.<br>(10.1007/978-1-4614-4205-9_9) | 1         | 0,39%         |
| <b>User Action Logging</b>                                                                      |           |               |
| tracking logs                                                                                   | 3         | 1,16%         |
| <b>Self-Reported / Diaries</b>                                                                  |           |               |
| Factor-Referenced Cognitive Tests (Paperfolding test)                                           | 1         | 0,39%         |
| <b>Interviews</b>                                                                               |           |               |
| structured                                                                                      |           |               |
| 1 to 6 scale                                                                                    | 1         | 0,39%         |
| <b>Question-answer-Protocol</b>                                                                 |           |               |
| closed response (during evaluation)                                                             | 1         | 0,39%         |

|                                                 |           |               |
|-------------------------------------------------|-----------|---------------|
| <b>Prototype focus</b>                          | <b>15</b> | <b>5,79%</b>  |
| <b>Interviews</b>                               |           |               |
| semi-structured                                 |           |               |
| open ended question/s                           | 3         | 1,16%         |
| unspecified                                     | 2         | 0,77%         |
| unstructured                                    | 3         | 1,16%         |
| unstructured post-experiment discussion         | 1         | 0,39%         |
| <b>Experts Review / Evaluation</b>              |           |               |
| Experts Interview                               | 2         | 0,77%         |
| <b>Questionnaire</b>                            |           |               |
| custom-made                                     |           |               |
| open ended question/s                           | 1         | 0,39%         |
| closed ended question/s                         | 1         | 0,39%         |
| <b>User Action Logging</b>                      |           |               |
| tracking logs                                   | 1         | 0,39%         |
| <b>Observation</b>                              |           |               |
| evaluators observations                         | 1         | 0,39%         |
| <b>Task performance</b>                         | <b>67</b> | <b>25,87%</b> |
| <b>User Action Logging</b>                      |           |               |
| system logs                                     | 39        | 15,06%        |
| tracking logs                                   | 24        | 9,27%         |
| evaluators count/measure                        |           |               |
| on material recorded                            | 1         | 0,39%         |
| <b>Observation</b>                              |           |               |
| evaluators observations                         | 1         | 0,39%         |
| evaluators coded/structured observations        | 1         | 0,39%         |
| <b>Questionnaire</b>                            |           |               |
| custom-made                                     |           |               |
| -3 to +3 scale                                  | 1         | 0,39%         |
| <b>UX - Emotion</b>                             | <b>9</b>  | <b>3,47%</b>  |
| <b>Questionnaire</b>                            |           |               |
| custom-made                                     |           |               |
| 1 to 6 scale                                    | 2         | 0,77%         |
| 6 Likert                                        | 1         | 0,39%         |
| order items                                     | 1         | 0,39%         |
| 5 Likert scale                                  | 1         | 0,39%         |
| Software Usability Measurement Inventory (SUMI) |           |               |
| 1 to 3 scale                                    | 2         | 0,77%         |
| Short Feedback Questionnaire (SFQ)              |           |               |
| 5 Likert scale                                  | 1         | 0,39%         |

|                                                                                                 |           |               |
|-------------------------------------------------------------------------------------------------|-----------|---------------|
| <b>Observation</b>                                                                              |           |               |
| evaluators observations                                                                         | 1         | 0,39%         |
| <b>UX - Meaning</b>                                                                             | <b>4</b>  | <b>2,70%</b>  |
| <b>Questionnaire</b>                                                                            | <b>4</b>  | <b>2,70%</b>  |
| Post Experiment Questionnaire for UX for MARs by Olsson et al.<br>(10.1007/978-1-4614-4205-9_9) | 2         | 1,16%         |
| Unified Theory of Acceptance and Use of Technology (UTAUT2)                                     |           |               |
| 7 Likert scale                                                                                  | 2         | 0,77%         |
| custom-made                                                                                     |           |               |
| 6 Likert                                                                                        | 2         | 0,77%         |
| <b>UX - Usability</b>                                                                           | <b>69</b> | <b>26,64%</b> |
| <b>Questionnaire</b>                                                                            |           |               |
| custom-made                                                                                     |           |               |
| 5 Likert scale                                                                                  | 9         | 3,47%         |
| 7 Likert scale                                                                                  | 6         | 2,32%         |
| -3 to +3 scale                                                                                  | 5         | 1,93%         |
| 6 Likert                                                                                        | 5         | 1,93%         |
| 1 to 5 scale                                                                                    | 4         | 1,54%         |
| 1 to 6 scale                                                                                    | 4         | 1,54%         |
| order items                                                                                     | 3         | 1,16%         |
| closed response multi-item                                                                      | 3         | 1,16%         |
| Software Usability Measurement Inventory (SUMI)                                                 |           |               |
| 1 to 3 scale                                                                                    | 10        | 3,86%         |
| System Usability Scale (SUS)                                                                    |           |               |
| 7 Likert scale                                                                                  | 4         | 1,54%         |
| Short Feedback Questionnaire (SFQ)                                                              |           |               |
| 5 Likert scale                                                                                  | 3         | 1,16%         |
| ISO 9241                                                                                        |           |               |
| part 9 - with only one Fatigue category (7 Likert)                                              | 3         | 1,16%         |
| NASA TLX                                                                                        |           |               |
| 100 scale                                                                                       | 2         | 0,77%         |
| presence questionnaire                                                                          |           |               |
| by Witmer and Singer (1998) - 7 Likert                                                          | 2         | 0,77%         |
| Unified Theory of Acceptance and Use of Technology (UTAUT2)                                     |           |               |
| 7 Likert scale                                                                                  | 1         | 0,39%         |

|                                    |          |              |
|------------------------------------|----------|--------------|
| <b>Interviews</b>                  |          |              |
| unstructured                       | 1        | 0,39%        |
| structured                         |          |              |
| 2 to 6 scale                       | 1        | 0,39%        |
| <b>Observation</b>                 |          |              |
| evaluators observations            | 2        | 0,77%        |
| <b>Experts Review / Evaluation</b> |          |              |
| Experts Interview                  | 1        | 0,39%        |
| <b>UX - Usefulness</b>             | <b>6</b> | <b>2,32%</b> |
| <hr/>                              |          |              |
| <b>Questionnaire</b>               |          |              |
| custom-made                        |          |              |
| 6 Likert                           | 2        | 0,77%        |
| -3 to +3 scale                     | 1        | 0,39%        |
| System Usability Scale (SUS)       |          |              |
| 7 Likert scale                     | 1        | 0,39%        |
| <b>Interviews</b>                  |          |              |
| unstructured                       | 2        | 0,77%        |



## Section B - Correlation charts

### Other

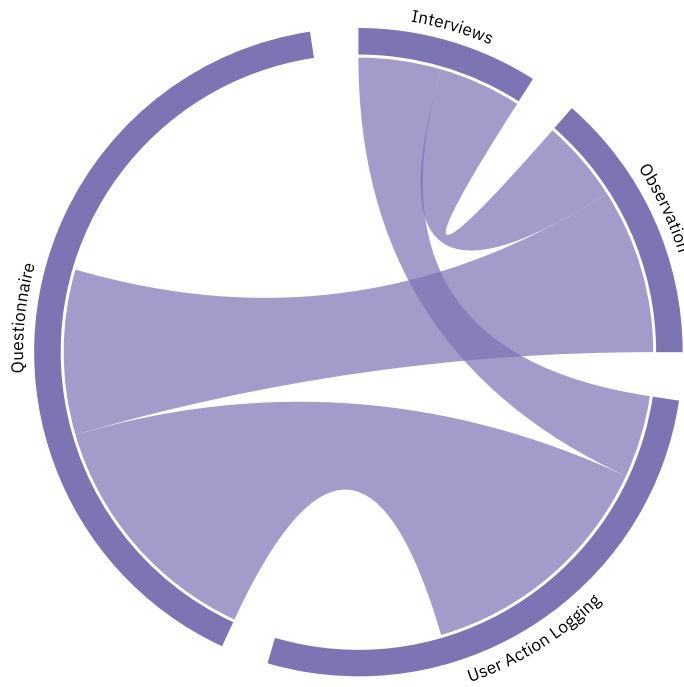

### Other

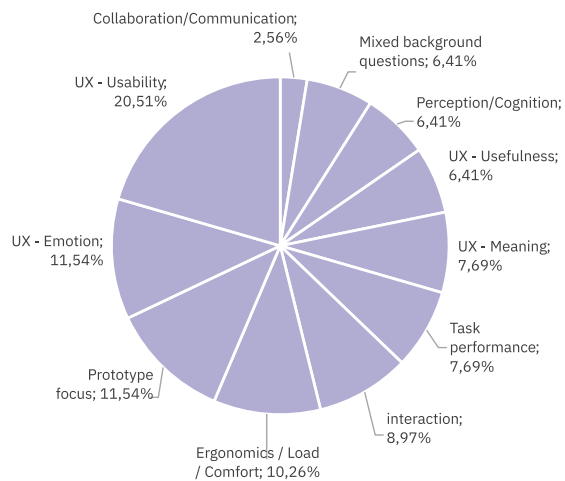

# Section C - Method Used & Aspects Matrix

Other

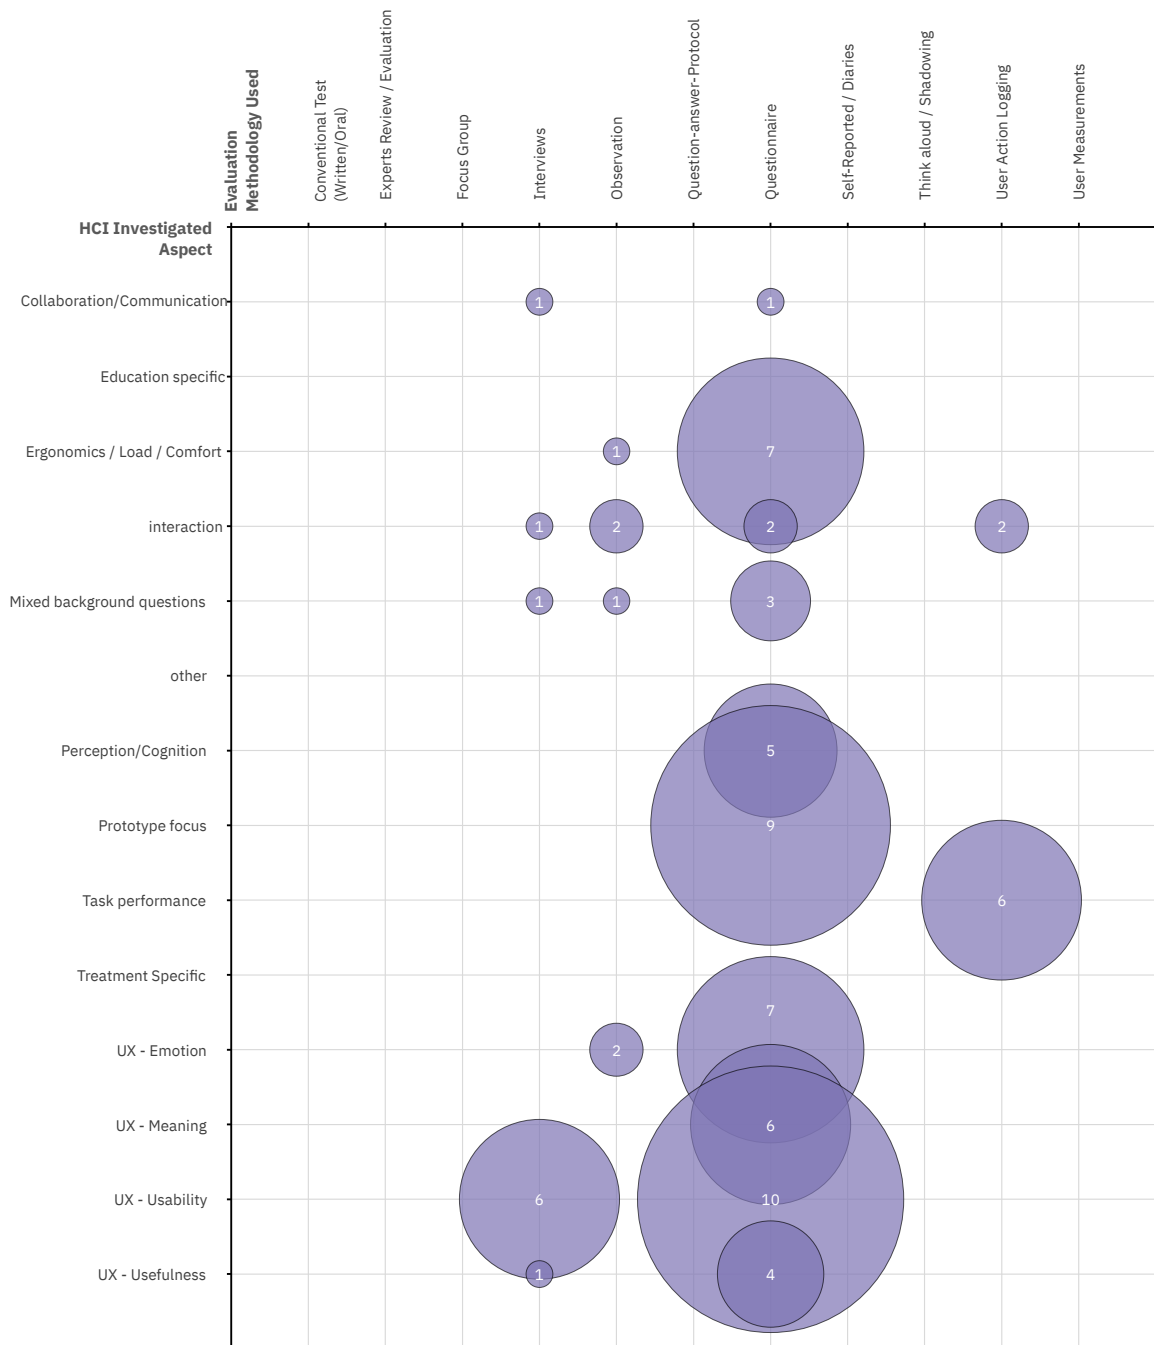

## Section D – Lookup Table: Other

|                                         |          |               |
|-----------------------------------------|----------|---------------|
| <b>Collaboration/Communication</b>      | <b>2</b> | <b>2,56%</b>  |
| <b>Interviews</b>                       |          |               |
| semi-structured                         | 1        | 1,28%         |
| <b>Questionnaire</b>                    |          |               |
| remote survey                           |          |               |
| online survey - Likert 7 scale          | 1        | 1,28%         |
| <b>Ergonomics / Load / Comfort</b>      | <b>8</b> | <b>10,26%</b> |
| <b>Questionnaire</b>                    |          |               |
| NASA TLX                                |          |               |
| modify Likert                           | 5        | 6,41%         |
| custom-made                             |          |               |
| 7 Likert scale                          | 2        | 2,56%         |
| <b>Observation</b>                      |          |               |
| evaluators observations                 | 1        | 1,28%         |
| <b>interaction</b>                      | <b>7</b> | <b>8,97%</b>  |
| <b>User Action Logging</b>              |          |               |
| tracking logs                           | 2        | 2,56%         |
| <b>Observation</b>                      |          |               |
| evaluators observations                 | 2        | 2,56%         |
| on material recorded                    | 1        | 1,28%         |
| <b>Questionnaire</b>                    |          |               |
| remote survey                           |          |               |
| online survey - polar choice            | 1        | 1,28%         |
| custom-made                             |          |               |
| 7 Likert scale                          | 1        | 1,28%         |
| <b>Interviews</b>                       |          |               |
| semi-structured                         | 1        | 1,28%         |
| <b>Mixed background questions</b>       | <b>5</b> | <b>6,41%</b>  |
| <b>Questionnaire</b>                    |          |               |
| remote survey                           |          |               |
| online survey - closed ended question/s | 2        | 2,56%         |
| online survey - 7 Likert scale          | 1        | 1,28%         |
| <b>Interviews</b>                       |          |               |
| semi-structured                         | 1        | 1,28%         |
| <b>Observation</b>                      |          |               |
| evaluators observations                 | 1        | 1,28%         |

|                                                |          |               |
|------------------------------------------------|----------|---------------|
| <b>Perception/Cognition</b>                    | <b>5</b> | <b>6,41%</b>  |
| <b>Questionnaire</b>                           |          |               |
| custom-made                                    |          |               |
| 7 Likert scale                                 | 4        | 5,13%         |
| remote survey                                  |          |               |
| online survey - Likert 7 scale                 | 1        | 1,28%         |
| <b>Prototype focus</b>                         | <b>9</b> | <b>11,54%</b> |
| <b>Questionnaire</b>                           |          |               |
| remote survey                                  |          |               |
| online survey - 7 Likert scale                 | 3        | 3,85%         |
| online survey - Likert 7 scale                 | 3        | 3,85%         |
| online survey - open ended question/s          | 2        | 2,56%         |
| online survey - open / closed ended question/s | 1        | 1,28%         |
| <b>Task performance</b>                        | <b>6</b> | <b>7,69%</b>  |
| <b>User Action Logging</b>                     | <b>6</b> | <b>7,69%</b>  |
| tracking logs                                  | 4        | 5,13%         |
| evaluators count/measure                       |          |               |
| on material recorded                           | 2        | 2,56%         |
| <b>UX - Emotion</b>                            | <b>9</b> | <b>11,54%</b> |
| <b>Questionnaire</b>                           | <b>7</b> | <b>8,97%</b>  |
| remote survey                                  |          |               |
| online survey - Likert 7 scale                 | 3        | 3,85%         |
| online survey - open / closed ended question/s | 1        | 1,28%         |
| custom-made                                    |          |               |
| Unspecified                                    | 1        | 1,28%         |
| 7 Likert scale                                 | 1        | 1,28%         |
| Intrinsic Motivation Inventory (IMI)           |          |               |
| 5 Likert scale                                 | 1        | 1,28%         |
| <b>Observation</b>                             |          |               |
| evaluators observations                        | 1        | 1,28%         |
| evaluators coded/structured observations       | 1        | 1,28%         |
| <b>UX - Meaning</b>                            | <b>6</b> | <b>7,69%</b>  |
| <b>Questionnaire</b>                           |          |               |
| AttrakDiff                                     |          |               |
| First Version - 5 item bipolar scale           | 3        | 3,85%         |
| remote survey                                  |          |               |
| online survey - Likert 7 scale                 | 1        | 1,28%         |
| online survey - 7 Likert scale                 | 1        | 1,28%         |
| custom-made: un-specificized                   | 1        | 1,28%         |

|                                                |           |               |
|------------------------------------------------|-----------|---------------|
| <b>UX - Usability</b>                          | <b>16</b> | <b>20,51%</b> |
| <b>Questionnaire</b>                           |           |               |
| custom-made                                    |           |               |
| 1 to 5 scale                                   | 3         | 3,85%         |
| 7 Likert scale                                 | 2         | 2,56%         |
| Unspecified                                    | 1         | 1,28%         |
| remote survey                                  |           |               |
| online survey - 7 Likert scale                 | 1         | 1,28%         |
| online survey - open / closed ended question/s | 1         | 1,28%         |
| online survey - Likert 7 scale                 | 1         | 1,28%         |
| NASA TLX                                       |           |               |
| modify Likert                                  | 1         | 1,28%         |
| <b>Interviews</b>                              |           |               |
| semi-structured                                | 6         | 7,69%         |
| <b>UX - Usefulness</b>                         | <b>5</b>  | <b>6,41%</b>  |
| <b>Questionnaire</b>                           | <b>4</b>  | <b>5,13%</b>  |
| remote survey                                  |           |               |
| online survey - Likert 7 scale                 | 2         | 2,56%         |
| online survey - 7 Likert scale                 | 1         | 1,28%         |
| Intrinsic Motivation Inventory (IMI)           |           |               |
| 5 Likert scale                                 | 1         | 1,28%         |
| <b>Interviews</b>                              |           |               |
| semi-structured                                | 1         | 1,28%         |
